# **Insect wing extract: A novel source for green synthesis of nanoparticles of antioxidant and antimicrobial potential**

**Running Title : Green synthesis of AGNPs for use as antioxidant and antimicrobial**

Parameshwar Jakinala<sup>1#</sup>, Nageshwar Lingampally<sup>1#</sup>, Bee Hameeda<sup>1#</sup>, R. Z. Sayyed<sup>2&</sup>, Yahya Khan M<sup>3&</sup>, Elsayed Ahmed Elsayed<sup>4,5&</sup>, Hesham El Enshasy<sup>6,7&</sup>

<sup>1</sup>Department of Microbiology, Osmania University, Hyderabad, Telangana, India

<sup>2</sup>Department of Microbiology, PSGVP Mandal's Arts, Science and Commerce College, Shahada, Maharashtra 425409, India

<sup>3</sup>Kalam Biotech Pvt. Ltd, Hyderabad, India

<sup>4</sup>Zoology Department, College of Science, King Saud University, Riyadh 11451, Saudi Arabia.

<sup>5</sup>Chemistry of Natural and Microbial Products Department, National Research Centre, Cairo 1,2622, Egypt

<sup>6</sup>Institute of Bioproduct Development (IBD), Universiti Teknologi Malaysia (UTM), Skudai, Johor Bahru, 81310, Malaysia.

<sup>7</sup>City of Scientific Research and Technology Applications, New Burg Al-Arab, Alexandria, 21934, Egypt.

## **Corresponding author**

**Dr. Hameeda Bee**

**Assistant Professor**

E-mail : drhami2009@gmail.com

<sup>#</sup>These authors contributed equally to this work

<sup>&</sup>These authors contributed equally to this work

## **Acknowledgments**

Author Parameshwar J is thankful to UGC-RGNF [F1-17.1/2014-15/RGNF-2014-15-SC-TEL-86198] for providing research fellowship and financial support under DST-PURSE (C-DST-PURSE-II/43/2018). The authors extend their appreciation to the Deanship of Scientific Research at King Saud University for funding this work through research group No (RG-1440-053). We thank IIOR (Indian Institute of Oil Seeds Research) Rajendranagar, TS and RARS (Regional Agricultural Research Station), Anakapalle, AP for providing fungal cultures used in this study and Researcher Supporting Project, Project No. (No. RSP-2020/52), King Saud University, Riyadh, Saudi Arabia

## 37 **Abstract**

38 Silver nanoparticles (AgNPs) are among the most widely synthesized and used nanoparticles  
39 (NPs). AgNPs have been traditionally synthesized from plant extracts, cobwebs, microorganisms,  
40 etc. However, their synthesis from wing extracts of common insect; *Mang mao* which is  
41 abundantly available in most of the Asian countries has not been explored yet. We report the  
42 synthesis of AgNPs from *M. mao* wings extract and its antioxidant and antimicrobial activity. The  
43 synthesized AgNPs were spherical, 40–60 nm in size and revealed strong absorption plasmon  
44 band around at 430 nm. Highly crystalline nature of these particles as determined by Energy-  
45 dispersive X-ray analysis and X-ray diffraction further confirmed the presence of AgNPs.  
46 Hydrodynamic size and zeta potential of AgNPs were observed to be 43.9 nm and -7.12 mV,  
47 respectively. Fourier-transform infrared spectroscopy analysis revealed the presence of  
48 characteristic amide proteins and aromatic functional groups. Thin-layer chromatography (TLC)  
49 and Gas chromatography-mass spectroscopy (GC-MS) analysis revealed the presence of fatty  
50 acids in the wings extract that may be responsible for biosynthesis and stabilization of AgNPs.  
51 Further, SDS-PAGE of the insect wing extract protein showed the molecular weight of 49 kDa. *M.*  
52 *mao* silver nanoparticles (MMAgNPs) exhibit strong antioxidant, broad-range antibacterial and  
53 antifungal activities, which signifies their biomedical and agricultural potential.

54

55 **Keywords:** Antimicrobial; Antioxidant; *Mang mao*; Silver nanoparticles.

## 57 Introduction

58 Recent past has witnessed a significant dominance of nanotechnology in every field of human  
59 life like biomedical and engineering because it is efficient, bio-friendly, safe and economical  
60 [1]. In recent years, biologically synthesized nanoparticles are preferred over their chemical  
61 counterparts [2]. Among various nanoparticles, silver nanoparticles are widely accepted since  
62 they can be monitored easily by UV–Vis spectrophotometry [3]. Silver nanoparticles have  
63 small size, large surface area, high dispersive ability [4] and exhibit antimicrobial, anticancer,  
64 antidiabetic, antioxidant, anti-inflammatory properties [5] and are used in food processing  
65 industries, medical implants, ointment fabrication and emulsions [6]. So far, reports on green  
66 synthesis of AgNPs are from plant extracts, sea weeds, microorganisms/ metabolites and  
67 different biomaterials [7-10] are reported. However, there are no reports from wings of *Mang*  
68 *Mao* insects that are abundantly available and rich in proteins, polysaccharides and lipids. *M.*  
69 *mao* (winged termite) are eusocial insects with three groups (soldiers, workers and queen)  
70 and are commonly observed during rainy season (Figure 1a).

71

72 **Figure 1 (a) *Mang Mao* insect. (b) (1) Silver nitrate solution; (2) *Mang Mao* wings**  
73 **extract; (3) Silver nanoparticles; (c) UV-Vis spectra of AgNPs synthesized by *Mang Mao***  
74 **wings extract.**

75

76 After heavy rain, these insects fly out in huge numbers during nights and get assembled  
77 near lights, and following day, shed their wings and get killed due to lack of moisture. *Mang*  
78 *Mao* insects are used as edible nutrient-rich and tasty food in most of the Asian countries and  
79 in rural areas they are also used to feed chickens, fish, birds and geckos. The wings of dead  
80 *M. mao* have a great environmental concern as it is a big waste. Insects' wings can be utilized  
81 as an alternative source for chitin and to synthesize nanoparticles [6, 8]. Hence, the present

82 study focused on biofabrication of AgNPs by using *M. mao* wings extract and evaluate  
83 antioxidant and antimicrobial potential.

## 84 **Materials and Methods**

### 85 **Collection and preparation of *Mang mao* wings**

86 *M. mao* wings used in the present study were collected during rainy season from Osmania  
87 University (17.4135° N, 78.5287° E) campus, Hyderabad, India. The wings were collected in  
88 sterilized glass beakers, aseptically washed twice with distilled water to remove dust  
89 particles, dried and stored at room temperature in air tight containers.

### 90 **Synthesis of silver nanoparticles (AgNPs)**

91 Biosynthesis of AgNPs from *Mang Mao* wings extract was carried out, following  
92 methodology given by Lateef et al.[8] *M. mao* wings (0.1 g) were hydrolyzed using 20 mL of  
93 0.1 M NaOH at 90 °C for 1 hour, cooled and the hydrolyzed solution was centrifuged at 8000  
94 rpm for 10 minutes. Supernatant was collected, pH adjusted to 7 from which 1 mL of wing  
95 extract was added to 49 mL of 1 mM silver nitrate (AgNO<sub>3</sub>) solution taken in 100 mL beaker  
96 and incubated at 28±1 °C for 30 minutes under static conditions for synthesis of AgNPs.  
97 Absorption maxima was measured at 200 to 700 nm using UV-Vis spectrophotometer  
98 (HITACHI U-2900, Japan) to characterize the *Mang Mao* silver nanoparticles (MMAgNPs)  
99 and later on the sample was centrifuged at 8000 rpm for 10 min followed by pellet wash with  
100 acetone and air dried for further studies.

### 101 **Optimization of MMAgNPs synthesis**

102 Effect of various process parameters on MMAgNPs synthesis was optimized using one  
103 variable at a time (OVAT) approach [9] where, the effect of a single parameter was evaluated  
104 initially and concentration obtained was used as a standard for all the subsequent steps.  
105 Parameters optimized using OVAT included AgNO<sub>3</sub> (1 to 3 mM), the concentration ratio of

106 silver nitrate and *M. mao* wings extract (1:1, 1:3, 1:5), pH (3 to 11) and reaction time (0 to 30  
107 minutes). The presence of AgNPs in the resultant solution was detected by the absorbance  
108 maxima as mentioned above.

### 109 **Stability study**

110 Above optimized MAgNPs were incubated at  $28 \pm 1$  °C in dark conditions for 120 days and  
111 absorbance maxima was measured weekly once to determine its stability

### 112 **Characterization of MAgNPs**

113 Scanning electron microscopy (SEM) of the sample was performed by dispersion of the  
114 sample in aluminum foil at 5.0 kV operating voltage using JSM-7500F and images were  
115 recorded at different magnifications. Energy-dispersive X-ray (EDX) analysis was performed  
116 by using Hitachi S-3400 NSEM instrument equipped with Thermo EDX for which the  
117 synthesized MAgNPs were dehydrated and coated on carbon film. X-ray diffraction (XRD)  
118 was carried out by drop-coating MAgNPs solution onto a glass substrate and diffraction  
119 was measured using Philips X'Pert Pro X-Ray diffractometer. The average crystal size of  
120 nanoparticles was estimated using Scherrer equation i.e.,  $D = K \lambda / \beta \cos \Theta$  [10]. The particle  
121 size distribution and zeta potential of MAgNPs was analyzed in triplicate by  
122 electrophoretic light scattering at 25 °C, 150 V (DelsaMax PRO Light Scattering Analyzer,  
123 Beckman Coulter, United States) in distilled water. Functional groups were determined by  
124 FTIR spectroscopy (Bruker Tensor 27) and spectra were measured in the range 4000–400  
125  $\text{cm}^{-1}$  wavelength using KBr pellet as background reference.

126 Size and zeta potential of the silver nanoparticles were determined by Malvern  
127 Zetasizer ZEN 3600 (United Kingdom). This instrument allows the measurement of particle  
128 sized distribution in the range 2 nm–3 nm [11].

### 129 **Thin layer chromatography and Gas chromatography mass spectroscopy**

130 Reducing compounds of *M. mao* wings extract was analyzed by TLC on silica gel plates  
131 (silica gel 60 F254, Merck, Germany) with mobile phase (chloroform: methanol {97:3}), and  
132 chromatogram was examined under UV fluorescence (11). GC-MS analysis of *Mang Mao*  
133 wings extract was performed according to method as described by Ha et al.[12].

### 134 **Extraction and purification of protein from *M.mao* wings**

135 The protein from *Mang Mao* wings were extracted as per Zhang et al.[13] and precipitated  
136 using ammonium sulfate till approximately 30% saturation and incubated overnight at 4 °C  
137 followed by centrifugation. Pellet obtained was suspended in 0.05 M Tris-HCl buffer (pH –  
138 7), with 0.1 M NaCl, and dialyzed against the same buffer for 24 h. The crude protein was  
139 filtered using a 0.22 µm membrane filter and then subjected to column chromatography using  
140 silica gel and used for synthesis of AgNPs. Crude and purified proteins were further analyzed  
141 by sodium dodecyl sulfate polyacrylamide gel electrophoresis (SDS-PAGE) and its molecular  
142 weight (Broad range 11 to 245 kDa, BioLabs, England) was determined [14].

### 143 **Antioxidant and antimicrobial activity of MMAgNPs**

#### 144 **DPPH free radical scavenging activity**

145 Antioxidant activity of MMAgNPs was evaluated by 2, 2-diphenyl-1-picrylhydrazyl (DPPH)  
146 free radical scavenging assay [11]. Reaction mixture consisted of equal volumes (1:1 w/v) of  
147 different concentrations of the synthesized MMAgNPs (100 to 500 µg mL<sup>-1</sup> in water), to  
148 which 1 mL of 0.5 mM DPPH in ethanol solution was added. The reaction mixture was  
149 incubated in dark for 30 min at 28±2 °C. The absorbance is measured at 517 nm by UV-Vis  
150 spectrophotometer. Standard used was ascorbic acid to determine scavenging activity which  
151 was calculated by following equation.

$$152 \quad \% \text{ scavenging activity} = [(A_{\text{control}} - A_{\text{test}}) / A_{\text{control}}] \times 100$$

#### 153 **Reducing power assay**

154 Ferric reducing power assay was determined with 1 mL of the synthesized MMAgNPs, 2.5  
155 mL of 0.2 M phosphate buffer (pH=6.6) and 2.5 mL of 1% potassium ferricyanide incubated  
156 at 50 °C for 20 minutes followed by cooling at room temperature. Then 2.5 mL of 10%  
157 trichloroacetic acid was added to the above mix and centrifuged at 8000 rpm for 20 min.  
158 Supernatant was mixed with distilled water in 1:1 v/v ratio and 1 mL of 0.1% ferric chloride  
159 was added and further incubated at 28± 2°C for 10 min. Spectrophotometric absorbance of  
160 the resultant solution was measured at 700 nm. Increase in absorbance of reaction mixture  
161 indicated reducing activity of sample.

### 162 **Determination of antibacterial and antifungal activity of MMAgNPS**

163 Antibacterial activity of MMAgNPs was tested against bacteria namely *Staphylococcus*  
164 *aureus* MTCC 96, *Pseudomonas aeruginosa* MTCC 424, *Escherichia coli* MTCC 43,  
165 *Klebsiella pneumonia* MTCC 9751 and *Achromobacter xylosoxidans* SHB 204 (obtained  
166 from our lab) and antifungal activity was tested against *Fusarium oxysporum f. sp. ricini*,  
167 *Fusarium oxysporum f. sp. lycopersici* MTCC 10270, *Phytophthora nicotianae*, *Fusarium*  
168 *sacchari* and *Colletotrichum falcatum* using agar well diffusion method [15] using nutrient  
169 and potato dextrose agar plates (Fungal strains were obtained from IIOR, Hyderabad and  
170 RARS, Andhra Pradesh). Aliquots of 50 µL of different concentrations of MMAgNPs (10 µg  
171 mL<sup>-1</sup>, 5 µg/mL, 2.5 µg mL<sup>-1</sup> and 1.25 µg mL<sup>-1</sup>) were separately added in the wells. The  
172 inoculated bacterial and fungal plates were incubated at 37 °C for 24 h and 28 °C for 72-96 h  
173 respectively and observed for inhibition of growth.

### 174 **Statistical analysis**

175 All the experiments were performed in triplicates, repeated twice and data was expressed as  
176 means ± standard deviation using Excel 2012, and graphs were drawn using Origin Pro 2015.

### 177 **Results and Discussion**

## 178 **Synthesis of MMAgNPs**

179 *M. mao* wings extract, rich in proteins, chitin and lipids was used for the reduction of AgNO<sub>3</sub>  
180 into AgNPs. The change in color of reaction mixture from yellow to dark brown after 30  
181 minutes incubation (Figure 1) indicated synthesis of MMAgNPs. The intensity of dark brown  
182 colour change indicated AgNPs formation from silver salt which is due to excitation of  
183 surface plasmon resonance (SPR) effect [16].

## 184 **Optimization of MMAgNPs synthesis**

185 During the optimization study using OVAT, AgNO<sub>3</sub> when used at 1 mM concentration  
186 showed maximum absorption at 430 nm, indicated active formation of MMAgNPs. Further  
187 increase in the concentration of AgNO<sub>3</sub> resulted in decreased absorption (Figure 2a). These  
188 results were in agreement with the previous investigations carried out as per Veerasamy et al.  
189 [17]. When, *M. mao* wings extract (1 mL) was added to AgNO<sub>3</sub> solution (1 mM), rapid  
190 conversion to brown color observed within 30 minutes, indicated active MMAgNPs synthesis  
191 (Figure 2b). The increased color change of brown color was directly proportional to the  
192 incubation period which is due to reduction of AgNO<sub>3</sub> and excitation of SPR [16]. The  
193 absorption peak varied with different pH and it ranged between 390-470 nm (Figure 2c). The  
194 MMAgNPs formation was found to be slow at acidic pH (2-5). At neutral pH (7) absorption  
195 maxima was observed at 430 nm and the reaction started as soon as AgNO<sub>3</sub> was added to the  
196 reaction mixture. The change in color to brown was observed within 30 minutes which  
197 indicated MMAgNPs synthesis (Figure 2d).

198

199 **Figure 2 (a) UV-vis spectra of aqueous silver nitrate concentration. (b) Concentration**  
200 **ratio of *Mang Mao* extract with 1 mM silver nitrate. (c) Different pH range. (d)**  
201 **Different time intervals**

202



203 Further, beyond pH 7 MMAgNPs resulted in aggregation and fall in flocculation.  
204 Previous studies revealed that at alkaline pH, Ag (I) ions in solution partly hydrolyze to form  
205 bioorganic-Ag(OH)<sub>x</sub> or bioorganic-Ag(NH<sub>3</sub>)<sub>2</sub> complex on the surface of the particle and  
206 AgOH/Ag<sub>2</sub>O colloid in the medium [18]. The characteristic absorption peak at 430 nm  
207 corresponded to SPR of AgNPs previously reported by Bahrami-Teimoori et al. [19], which  
208 thereby confirmed the synthesis of MMAgNPs. This indicates the significance of *M. mao*  
209 wings extract in the reduction of metal salts to their respective metal nano-particles.

### 210 **Stability study of MMAgNPs**

211 The stability of MMAgNPs was monitored up to 120 days (weekly once) and there was no  
212 change in absorbance at 430 nm (data not shown). This indicated strong stability of  
213 biosynthesized MMAgNPs which might be attributed to presence of carboxylate group in  
214 proteins that may result in stable nanoparticles [20].

### 215 **Characterization of MMAgNPs**

#### 216 **UV–visible spectroscopic analysis of MMAgNPs**

217 Nanoparticles synthesis is generally found to occur due to excitation of surface plasmon  
218 resonance (SPR) [21]. The strongest absorption peak observed at 430 nm (Figure 1c)  
219 corresponds to SPR of AgNPs which is in accordance with previous reports [22, 23].

#### 220 **SEM and EDX analysis of MMAgNPs**

221 SEM analysis revealed the occurrence of MMAgNPs in a spherical shape and their size  
222 ranged between 40 to 60 nm. The results showed that variation of pH in reaction mixture  
223 altered the nanoparticles size (Figure 3), however, at neutral pH the nanoparticles were  
224 uniform (Figure 3). Reddy et al. [24] reported that biosurfactants (surfactin) used for AgNPs  
225 synthesis altered the pH and decreased AgNPs size (9.7 to 4.9 nm) and at pH-9 the nano-  
226 particles were uniform. However, MMAgNPs were not uniform in size, and variations in  
227 nanoparticle's size were reported by Ahmed et al. [25] and Narayan and Dipak [26] using

228 plant and seaweed extracts. The EDX spectra of MMAgNPs revealed the presence of  
229 characteristic signals of silver ions at 3keV (Figure 4a) similar to those observed with  
230 chemically synthesized AgNPs. The emission energy at 3 keV indicated the reduction of  
231 silver ions to elemental silver [27].

232

233 **Figure 3 SEM images (a) pH-3. (b) pH-5. (c) pH-7. (d) pH-9. (e) pH-11**

234

### 235 **XRD analysis of MMAgNPs**

236 The XRD pattern of MMAgNPs showed the diffraction peaks at  $2\theta$  values of  $32.6^\circ$ ,  $46.57^\circ$ ,  
237  $67.8^\circ$  and  $77.04^\circ$  which further confirmed crystalline nature of MMAgNPs (Figure 4b) and  
238 corresponded to standard JCPDS file No. 04-0783 [28]. Broadening in peaks occurred due to  
239 smaller particle size, which reflects the experimental conditions on nucleation and growth of  
240 crystal nuclei [29]. According to Debye Scherrer equation, the average nanoparticle size in  
241 this study was found to be 32 nm, which was relatively similar as described earlier by Sri  
242 Ramkumar et al.[30].

243

244 **Figure 4 (a) Energy dispersive X-ray analysis of the synthesized MMAgNPs. (b) XRD**  
245 **pattern of biosynthesized silver nanoparticles using *Mang Mao* wings extract.**

246

### 247 **Zeta potential**

248 Particle size distribution and zeta potential of MMAgNPs was depicted in Figure 5a & 5b.  
249 Average particle size of synthesized MMAgNPs was 43.9 nm and zeta potential -7.12 mV.  
250 The negative charges on AgNPs might be due to *Mang Mao* wings extract covering on  
251 nanoparticles. For the determination of overall surface charges on nanoparticles zeta potential  
252 analysis was applied.

253

254 **Figure 5 Characterization of MMAgNPs by (a) DLS size distribution and (b) zeta**  
255 **potential analysis**

256  
257 Stability and prevention of aggregate formation, attributed to repulsions, due to same  
258 charge is provided by positive or negative charge on surface of nanoparticles [31]. This  
259 indicates better stability of nanoparticles and prevents agglomeration [32]. Hydrodynamic  
260 size and zeta potential of MMAgNPs in this study, corroborate with recent report of Badoei-  
261 dalfard et al. [33] hydrodynamic size (30-50 nm) of AgNPs synthesized using uricase from  
262 *Alcaligenes faecalis* GH3 and zeta potential (-4.6 mV) using *Madhuca longifolia* flower  
263 extract [31].

264 **FTIR analysis**

265 Identification of bond linkages and functional groups involved in reduction and stability  
266 AgNPs synthesis were performed using FTIR. The FTIR spectra of *M. mao* wings extract and  
267 synthesis of AgNPs is shown in Figure 6. *M. mao* wings extract bands observed at 3383,  
268 1740, 1641, 1369, 1211, 1049 and 892  $\text{cm}^{-1}$ , which is related to stretching vibrations of OH  
269 of carboxylic acids, C=O of ester fatty acid group, C=O of amide band, C-H of aliphatic  
270 bending group, C-O-C of polysaccharide, C-O stretching and  $-\text{C}=\text{O}$  of inorganic carbonate  
271 respectively.

272

273 **Figure 6 FTIR pattern of the *Mang Mao* wings extract and synthesized MMAgNPs**

274  
275 After reduction, AgNPs form the bands observed at 3291, 2885-2828, 1801, 1643,  
276 1552, 1403, 1322, 1046 and 650  $\text{cm}^{-1}$  which is related to stretched vibrations of OH of  
277 carboxylic acids, C-H of aliphatics, C=O of anhydride, C=O of amide bond, C=C aromatic,  
278 CH of aliphatic bending group,  $\text{NO}_2$  stretch, C-O stretching and N-H stretch respectively.  
279 Biomolecules present in the *M. mao* wings extract might be responsible for synthesis and

280 stability of AgNPs. The characteristic FTIR peaks observed in the present study were similar to  
281 those reported by Dhanasekaran et al.[34] and Usha et al. [35]. Similar results were reported by  
282 Selvakumar et al.[36] and Soman and Ray [37] where synthesis is performed using *Acalypha*  
283 *hispidia* and *Ziziphus oenoplia* (L.) leaf extract as reducing and stabilizing agent.

#### 284 **TLC of Mang Mao wings extract**

285 TLC analysis of *Mang Mao* wings extract corresponded to Rf value 0.96 which is similar to  
286 insect chemicals based on previous studies [38]. These chemicals may also be responsible for  
287 biofabrication of MMAgNPs (Figure 7a).

288

289 **Figure 7 (a) TLC of *Mang Mao* wings extract: (1) UV visualization, (2) Ninhydrin**  
290 **reagent. (b) SDS-PAGE analysis of *Mang Mao* wings extract protein; Lane 1. Molecular**  
291 **size marker; lane 2. Crude protein; lane 3. Purified protein (46 kDa) responsible for**  
292 **active biosynthesized MMAgNPs**

293

#### 294 **Gas chromatography mass spectrometric analysis**

295 GC–MS data revealed that *M.mao* wings extract have 30 major compounds with their  
296 molecular weight shown in Table 1. Major components of wings are comprised by aliphatic  
297 hydrocarbons and are 9-Octadecynoic acid (16.9%), Nonadecanoic acid (11.4), Ethyl 9-  
298 octadecenoate (9.8%), Heptacosanoic acid (4.9%), 1-[2-Deoxy-.beta.-d-erythro-  
299 pentofuranosyl] p (4.6%), Hexadecanoic acid (3.7%), 3-Nonyl-2-ol (3.7%), 8-acetoxy-6-  
300 benzenesulfonyl-2-th (3.2%), Ethanone (3.1%), 1,5-Cyclooctadiene (3%). These components  
301 may be responsible for the reduction and capping of silver ions. Octadecynoic acid and  
302 hexadecanoic acid are fatty acids that are widely observed in insects, plants and animals [39-  
303 41]. These fatty acids are situated within wings membrane under the epicuticular surface [12,

304 41]. The components present in *Mang Mao* wings extract corresponds with that of previous  
 305 reports on nanoparticles synthesis [36, 42, 43].

306 **Table 1.** GC-MS analysis of *M. mao* wings extract  
 307

| Peak | Retention Time | Peak Area | Area (%) | Peak Height | Base m/z | Compounds present                              |
|------|----------------|-----------|----------|-------------|----------|------------------------------------------------|
| 1    | 4.293          | 16038     | 2.80     | 5062        | 43.95    | Aspidospermidine-3-carboxylic acid, 2,3-dide   |
| 2    | 7.462          | 9307      | 1.63     | 4568        | 43.90    | Histidine, 4-nitro-                            |
| 3    | 10.765         | 8152      | 1.42     | 4045        | 333.80   | trans-5-Hydroxytricyclo[4.4.0.0(3,8)]-4-carbo  |
| 4    | 11.670         | 6678      | 1.17     | 1309        | 42.90    | 5-Pyrimidinecarboxylic acid, hexahydro-5-(1-   |
| 5    | 13.051         | 18391     | 3.21     | 4402        | 43.95    | Acetic acid, 8-acetoxy-6-benzenesulfonyl-2-th  |
| 6    | 15.405         | 6944      | 1.21     | 3476        | 43.90    | p-Chlorocinnamide                              |
| 7    | 16.978         | 13566     | 2.37     | 4121        | 58.90    | 2,5,7-Metheno-3H-cyclopenta[a]pentalen-3-o     |
| 8    | 17.055         | 17249     | 3.01     | 1863        | 40.00    | 1,5-Cyclooctadiene                             |
| 9    | 17.287         | 18141     | 3.17     | 5052        | 43.90    | Ethanone, 1-(4-pyridinyl)-, oxime              |
| 10   | 17.320         | 26832     | 4.69     | 5182        | 43.90    | 1-[2-Deoxy-.beta.-d-erythro-pentofuranosyl]p   |
| 11   | 17.554         | 65501     | 11.44    | 26163       | 88.00    | Nonadecanoic acid, ethyl ester                 |
| 12   | 19.309         | 96933     | 16.94    | 43045       | 66.95    | 9-Octadecynoic acid                            |
| 13   | 19.366         | 56171     | 9.81     | 24672       | 54.95    | Ethyl 9-octadecenoate, (E)-                    |
| 14   | 19.405         | 7072      | 1.24     | 6466        | 43.95    | 3-p-Toluenesulfonyl-7-hydroxymethyl-9-hydr     |
| 15   | 19.634         | 21515     | 3.76     | 12272       | 330.11   | Hexadecanoic acid                              |
| 16   | 21.610         | 12089     | 2.11     | 3085        | 43.95    | Scilliroside                                   |
| 17   | 21.909         | 8632      | 1.51     | 3507        | 66.90    | Cyclohexanol, 2-butyl-                         |
| 18   | 22.146         | 10102     | 1.77     | 3802        | 43.95    | 6-Benzenesulfonyl-2-oxa-6-aza-adamantane-      |
| 19   | 22.980         | 9703      | 1.70     | 6415        | 73.10    | Heptasiloxane, hexadecamethyl-                 |
| 20   | 23.045         | 10758     | 1.88     | 3399        | 44.00    | N-[2,2,2-Trifluoro-1-(isopropylamino)-1-(trifl |
| 21   | 23.390         | 10906     | 1.91     | 1134        | 43.90    | Carboethoxy-1-piperazinethiocarboxylic acid    |
| 22   | 23.520         | 6339      | 1.11     | 2346        | 43.85    | Acetamide, 2,2-dichloro-                       |
| 23   | 24.200         | 21662     | 3.78     | 3185        | 43.05    | 3-Nonyn-2-ol                                   |
| 24   | 24.830         | 9090      | 1.59     | 4327        | 53.00    | 2-Chloro-3-(chloromethyl)-4-pentenoic acid,    |
| 25   | 24.923         | 13120     | 2.29     | 4364        | 41.00    | Butanoic acid, 3-bromo-, ethyl ester           |
| 26   | 26.067         | 14088     | 2.46     | 3903        | 42.95    | 3-Cyclopentene-1-propanoic acid, 5-(methox     |
| 27   | 26.337         | 28275     | 4.94     | 6648        | 43.05    | Heptacosanoic acid, methyl ester               |
| 28   | 26.526         | 7775      | 1.36     | 3530        | 40.10    | 1(2H)-Naphthalenone, 4-ethoxyoctahydro-, tr    |
| 29   | 27.795         | 13904     | 2.43     | 3102        | 95.90    | 2-Monooleoylglycerol trimethylsilyl ether      |
| 30   | 30.559         | 7400      | 1.29     | 4819        | 73.00    | 3-Isopropoxy-1,1,1,5,5,5-hexamethyl-3-(trime   |

308

### 309 **Extraction and purification of Mang Mao wings extract**

310 SDS-PAGE analysis revealed the presence of different cellular proteins with molecular  
 311 weights that ranged between 22-245 kDa. Protein band corresponded to 46 kDa (Figure 7b)  
 312 was found to act as a capping agent for stabilization of the MMAgNPs.

313 Khan and Ahmad [44] reported, purified sulfite reductase enzyme with molecular  
314 weight of 43 kDa to be responsible for gold nanoparticles stability and synthesis. Kumar et al.  
315 [45] also claimed protein of 35.6 kDa is responsible for biosynthesis and capping agent of  
316 gold nanoparticles. However, further studies are required towards characterization and  
317 identification of this protein to validate this result.

### 318 **Antioxidant activity of MMAgNPs**

319 MMAgNPs exhibited DPPH scavenging activity in the range of 66.8 to 87.0% and in case of  
320 ascorbic acid it was found to be in the range of 89.7 to 95.5% (Figure 8a). Difference in the  
321 activity can be attributed to a different functional group attached to them. MMAgNPs showed  
322 good ferric ion reducing activity which was comparable to that of standard ascorbic acid  
323 (Figure 8b). Results obtained from this study suggested the use of biosynthesized MMAgNPs  
324 as natural antioxidants. Free radical scavenging activity of MMAgNPs is mainly due to the  
325 donation of hydrogen molecules, such as proteins, polyphenols and other biomolecules  
326 present in the colloidal solution of AgNPs [23]. Radical scavenging activity of AgNPs is due  
327 to presence of bioreductant molecules on surface of nanoparticles increasing the surface area  
328 for antioxidant activity [11]. Therefore, these MMAgNPs can be employed as a natural  
329 antioxidant in the pro-oxidants, antioxidants and to balance reactive oxygen species (ROS)  
330 levels. Previous study of AgNPs synthesized using *Catharanthus roseus* showed radical  
331 scavenging activity and prevented human cell damage and degenerative diseases [46]. This  
332 work concludes the use of MMAgNPs as potential agent of antioxidant formulations in  
333 biomedical/ pharmaceutical areas.

334

335 **Figure 8 Antioxidant activity: (a) DPPH scavenging activity. (b) Ferric reducing**  
336 **antioxidant activity.**

337

## 338 **Antimicrobial activity of MMAgNPs**

339 Biosynthesized MMAgNPs exhibited potential antibacterial and antifungal activity.  
340 MMAgNPs showed maximum zone of inhibition of  $35\pm 0.4$  mm and minimum zone of  
341 inhibition of  $16\pm 0.2$  mm against *Staphylococcus aureus* MTCC 96 and *Achromobacter*  
342 *xylooxidans* SHB 204 respectively, when used at a concentration of  $10\ \mu\text{g mL}^{-1}$  and the  
343 results of the same are shown in Figure 9. Whereas, maximum percentage of inhibition of  
344  $86.6\pm 0.4$  mm and minimum percentage of inhibition of  $62.7\pm 0.4$  mm was recorded against  
345 *Fusarium oxysporum f. sp. ricini* and *Colletotrichum falcatum* respectively when the  
346 MMAgNPs were used at a concentration of  $10\ \mu\text{g mL}^{-1}$ . MMAgNPs served as potential  
347 antibacterial, antifungal agents and may emerge as an alternative to conventional antibiotics  
348 [47].

### 349 **Figure 9. Antimicrobial activity of synthesized MMAgNPs**

351  
352 These AgNPs due to their small size can adhere to bacterial cell membrane, increase  
353 permeability and can cause structural changes in bacteria. In case of fungi, AgNPs disrupt the  
354 membrane integrity and fungal spores leading to cell death [48]. Some researchers claimed  
355 that AgNPs enter the microorganisms and can cause damage by interacting with DNA and  
356 proteins, resulting in apoptosis [49].

## 357 **Conclusion**

358 In this study, we explored *M. mao* wings extract as an eco-friendly, cost-effective and novel  
359 biomaterial for biofabrication of AgNPs. This is the first report on use of *M. mao* (seasonal  
360 insect) wings with metal chelating potential can be used as natural reducing agents for the  
361 synthesis of nanoparticles. Antioxidant and antimicrobial properties of MMAgNPs may  
362 further widen their application in the biomedical and agricultural sectors.

## 363 **Contributors**

364 Conceptualization; HB.; Methodology, PJ and NL; Validation, HB and HE; formal analysis,  
365 PJ and NL; Investigation, PJ and NL, YA; writing—original draft preparation, HB and RA.;  
366 writing—RZS, AS and HE; supervision, HB.; project administration, HB; funding acquisition,  
367 AA, MA and HE.

368



## 370 References

- 371 [1]. Abdelghany, T M, Aisha M. H. Al-Rajhi, Mohamed A. Al Abboud, M. M. Alawlaqi,  
372 A. Ganash Magdah, Eman A. M. Helmy, Ahmed S. Mabrouk. Recent advances in  
373 green synthesis of silver nanoparticles and their applications: about future directions. A  
374 Review. Bionanoscience. BioNanoScience; 2018; 8: 5–16. doi:10.1007/s12668-017-  
375 0413-3
- 376 [2]. Agnihotri S, Mukherji S, Mukherji S. Immobilized silver nanoparticles enhance contact  
377 killing and show highest efficacy: Elucidation of the mechanism of bactericidal action  
378 of silver. Nanoscale. 2013;5: 7328–7340. doi:10.1039/c3nr00024a
- 379 [3]. Ahmed S, Saifullah, Ahmad M, Swami BL, Ikram S. Green synthesis of silver  
380 nanoparticles using *Azadirachta indica* aqueous leaf extract. J Radiat Res Appl Sci.  
381 Elsevier Ltd; 2016;9: 1–7. doi:10.1016/j.jrras.2015.06.006
- 382 [4]. Al-Shmgani HSA, Mohammed WH, Sulaiman, Saadon AH. Biosynthesis of silver  
383 nanoparticles from *Catharanthus roseus* leaf extract and assessing their antioxidant,  
384 antimicrobial, and wound-healing activities. Artif Cells, Nanomedicine Biotechnol.  
385 2017;45: 1234–1240. doi:10.1080/21691401.2016.1220950
- 386 [5]. Badoei-dalfard A, Shaban M, Karami Z. Characterization, antimicrobial, and  
387 antioxidant activities of silver nanoparticles synthesized by uricase from *Alcaligenes*  
388 *faecalis* GH3. Biocatal Agric Biotechnol. Elsevier Ltd; 2019; 101257.  
389 doi:10.1016/j.bcab.2019.101257
- 390 [6]. Bahrami-Teimoori B, Nikparast Y, Hojatianfar M, Akhlaghi M, Ghorbani R, Pourianfar  
391 HR. Characterisation and antifungal activity of silver nanoparticles biologically  
392 synthesised by *Amaranthus retroflexus* leaf extract. J Exp Nanosci. Taylor & Francis;  
393 2017;12: 129–139. doi:10.1080/17458080.2017.1279355
- 394 [7]. Baker C, Pradhan A, Pakstis L, Pochan D, Shah SI. Synthesis and antibacterial  
395 properties of silver nanoparticles. J Nanosci Nanotechnol. 2005;5: 244–249.  
396 doi:10.1166/jnn.2005.034
- 397 [8]. Basu S, Maji P, Ganguly J. Rapid green synthesis of silver nanoparticles by aqueous  
398 extract of seeds of *Nyctanthes arbor-tristis*. Appl Nanosci. Springer Berlin Heidelberg;  
399 2016; 1–5. doi:10.1007/s13204-015-0407-9
- 400 [9]. Belle Ebanda Kedi P, Eya'ane Meva F, Kotsedi L, Nguemfo EL, Bogning Zanguéu C,  
401 Ntumba AA, Hamza Elsayed A M, Alain Bertrand D, Malik M. Eco-friendly  
402 synthesis, characterization, in vitro and in vivo anti-inflammatory activity of silver  
403 nanoparticle-mediated *Selaginella myosurus* aqueous extract. Int J Nanomedicine.  
404 2018;Volume 13: 8537–8548. doi:10.2147/IJN.S174530
- 405 [10]. Buckner JS, Hagen MM. Triacylglycerol and phospholipid fatty acids of the silverleaf  
406 whitefly : composition and biosynthesis. Arch Insect Biochem Physiol. 2003;79: 66–79.  
407 doi:10.1002/arch.10086
- 408 [11]. Chandrasekhar N, Vinay SP. Yellow colored blooms of *Argemone mexicana* and  
409 *Turnera ulmifolia* mediated synthesis of silver nanoparticles and study of their  
410 antibacterial and antioxidant activity. Appl Nanosci. Springer Berlin Heidelberg;  
411 2017;7: 851–861. doi:10.1007/s13204-017-0624-5
- 412 [12]. Chowdhury S, Basu A, Kundu S. Green synthesis of protein capped silver nanoparticles  
413 from phytopathogenic fungus *Macrophomina phaseolina* (Tassi) Goid with  
414 antimicrobial properties against multidrug-resistant bacteria. Nanoscale Res Lett.  
415 2014;9: 1–11. doi:10.1186/1556-276X-9-365
- 416 [13]. Dey A, Purkait MK. Effect of fatty acid chain length and concentration on the structural  
417 properties of the coated CoFe<sub>2</sub>O<sub>4</sub> nanoparticles. J Ind Eng Chem. The Korean

- 418 Society of Industrial and Engineering Chemistry; 2014; doi:10.1016/j.jiec.2014.09.027
- 419 [14]. Dhanasekaran D, Latha S, Saha S, Thajuddin N, Panneerselvam A. Extracellular  
420 biosynthesis, characterisation and in-vitro antibacterial potential of silver nanoparticles  
421 using *Agaricus bisporus*. *J Exp Nanosci*. 2013;8: 579–588.  
422 doi:10.1080/17458080.2011.577099
- 423 [15]. Franci G, Falanga A, Galdiero S, Palomba L, Rai M, Morelli G, Galdiero M. Silver  
424 nanoparticles as potential antibacterial agents. *Molecules*. 2015;20: 8856–8874.  
425 doi:10.3390/molecules20058856
- 426 [16]. Ghaffari-Moghaddam M, Hadi-Dabanlou R. Plant mediated green synthesis and  
427 antibacterial activity of silver nanoparticles using *Crataegus douglasii* fruit extract. *J*  
428 *Ind Eng Chem. The Korean Society of Industrial and Engineering Chemistry*; 2014;20:  
429 739–744. doi:10.1016/j.jiec.2013.09.005
- 430 [17]. Gołębiowski M, Boguś MI, Paszkiewicz M, Stepnowski P. Cuticular lipids of insects as  
431 potential biofungicides: Methods of lipid composition analysis. *Anal Bioanal Chem*.  
432 2011;399: 3177–3191. doi:10.1007/s00216-010-4439-4
- 433 [18]. Govindappa M, Hemashekhar B, Arthikala MK, Ravishankar Rai V, Ramachandra YL.  
434 Characterization, antibacterial, antioxidant, antidiabetic, anti-inflammatory and  
435 antityrosinase activity of green synthesized silver nanoparticles using *Calophyllum*  
436 *tomentosum* leaves extract. *Results Phys*. 2018;9: 400–408.  
437 doi:10.1016/j.rinp.2018.02.049
- 438 [19]. Ha S, Nguyen T, Webb HK, Hasan J, Tobin MJ, Crawford RJ, Ivanova EP. Dual role of  
439 outer epicuticular lipids in determining the wettability of dragonfly wings. *Colloids*  
440 *Surfaces B Biointerfaces*. Elsevier B.V.; 2013;106: 126–134.  
441 doi:10.1016/j.colsurfb.2013.01.042
- 442 [20]. Iijima M, Kawaharada Y, Tatami J. Effect of fatty acids complexed with  
443 polyethyleneimine on the flow curves of TiO<sub>2</sub> nanoparticle / toluene suspensions.  
444 *Integr Med Res. Taibah University*; 2016;4: 277–281. doi:10.1016/j.jascr.2016.05.003
- 445 [21]. Kagithoju S, Godishala V, Nanna RS. Eco-friendly and green synthesis of silver  
446 nanoparticles using leaf extract of *Strychnos potatorum* Linn.F. and their bactericidal  
447 activities. *3 Biotech*. Springer Berlin Heidelberg; 2015;5: 709–714.  
448 doi:10.1007/s13205-014-0272-3
- 449 [22]. Khan SA, Ahmad A. Enzyme mediated synthesis of water-dispersible, naturally protein  
450 capped, monodispersed gold nanoparticles; Their characterization and mechanistic  
451 aspects. *RSC Adv*. 2014;4: 7729–7734. doi:10.1039/c3ra43888k
- 452 [23]. Krishnaraj C, Jagan EG, Rajasekar S, Selvakumar P, Kalaichelvan PT, Mohan N.  
453 Synthesis of silver nanoparticles using *Acalypha indica* leaf extracts and its  
454 antibacterial activity against water borne pathogens. *Colloids Surfaces B Biointerfaces*.  
455 2010;76: 50–56. doi:10.1016/j.colsurfb.2009.10.008
- 456 [24]. Kumar SA, Abyaneh MK, Gosavi SW, Kulkarni SK, Ahmad A, Khan MI. Sulfite  
457 reductase-mediated synthesis of gold nanoparticles capped with phytochelatin.  
458 *Biotechnol Appl Biochem*. 2007;47: 191–5. doi:10.1042/BA20060205
- 459 [25]. Kumar V, Gundampati RK, Singh DK, Jagannadham M V., Sundar S, Hasan SH.  
460 Photo-induced rapid biosynthesis of silver nanoparticle using aqueous extract of  
461 *Xanthium strumarium* and its antibacterial and antileishmanial activity. *J Ind Eng*  
462 *Chem. The Korean Society of Industrial and Engineering Chemistry*; 2016;37: 224–  
463 236. doi:10.1016/j.jiec.2016.03.032
- 464 [26]. Kuyumcu E. Natural product research: formerly natural product letters chemical  
465 composition and antimicrobial activity of essential oil of *Achillea cretica* L .  
466 (Asteraceae) from. *Nat Prod Res*. 2012;26: 37–41.

- 467 [27]. Lateef A, Ojo SA, Azeez MA, Asafa TB, Yekeen TA, Akinboro A, I. C. Oladipo,  
468 E. B. Gueguim-Kana, L. S. Beukes. Cobweb as novel biomaterial for the green and  
469 eco-friendly synthesis of silver nanoparticles. *Appl Nanosci*. Springer Berlin  
470 Heidelberg; 2016;6: 863–874. doi:10.1007/s13204-015-0492-9
- 471 [28]. Mohanta YK, Nayak D, Biswas K, Singdevsachan SK, Abd Allah EF, Hashem A,  
472 Alqarawi AA, Yadav D, Mohanta TK. Silver nanoparticles synthesized using wild  
473 mushroom show potential antimicrobial activities against food borne pathogens.  
474 *Molecules*. 2018;23: 1–18. doi:10.3390/molecules23030655
- 475 [29]. Narayan S, Dipak S. Green synthesis of silver nanoparticles using fresh water green  
476 alga *Pithophora oedogonia* ( Mont .) Wittrock and evaluation of their antibacterial  
477 activity. *Appl Nanosci*. 2015; 703–709. doi:10.1007/s13204-014-0366-6
- 478 [30]. Netala VR, Kotakadi VS, Bobbu P, Gaddam SA, Tartte V. Endophytic fungal isolate  
479 mediated biosynthesis of silver nanoparticles and their free radical scavenging activity  
480 and anti microbial studies. *3 Biotech*. Springer Berlin Heidelberg; 2016;6: 1–9.  
481 doi:10.1007/s13205-016-0433-7
- 482 [31]. Oves M, Khan MS, Zaidi A, Ahmed AS, Ahmed F, Ahmad E, Sherwani A, Owais  
483 M, Azam A. Antibacterial and cytotoxic efficacy of extracellular silver nanoparticles  
484 biofabricated from chromium reducing novel OS4 strain of *Stenotrophomonas*  
485 *maltophilia*. *PLoS One*. 2013;8. doi:10.1371/journal.pone.0059140
- 486 [32]. Patil MP, Singh RD, Koli PB, Patil KT, Jagdale BS, Tipare AR, Kim GD. Antibacterial  
487 potential of silver nanoparticles synthesized using *Madhuca longifolia* flower extract as  
488 a green resource. *Microb Pathog*. Elsevier Ltd; 2018;  
489 doi:10.1016/j.micpath.2018.05.040
- 490 [33]. Rafique M, Sadaf I, Rafique MS, Tahir MB. A review on green synthesis of silver  
491 nanoparticles and their applications. *Artif Cells, Nanomedicine Biotechnol*. Informa  
492 UK Limited, trading as Taylor & Francis Group; 2017;45: 1272–1291.  
493 doi:10.1080/21691401.2016.1241792
- 494 [34]. Rane AN, Baikar V V., Ravi Kumar D V., Deopurkar RL. Agro-industrial wastes for  
495 production of biosurfactant by *Bacillus subtilis* ANR 88 and its application in synthesis  
496 of silver and gold nanoparticles. *Front Microbiol*. 2017;8: 1–12.  
497 doi:10.3389/fmicb.2017.00492
- 498 [35]. Reddy AS, Chen CY, Baker SC, Chen CC, Jean JS, Fan CW, Chen RH, Chen JW.  
499 Synthesis of silver nanoparticles using surfactin: A biosurfactant as stabilizing agent.  
500 *Mater Lett*. Elsevier B.V.; 2009;63: 1227–1230. doi:10.1016/j.matlet.2009.02.028
- 501 [36]. Selvakumar P, Sithara R, Viveka K, Sivashanmugam P. Green synthesis of silver  
502 nanoparticles using leaf extract of *Acalypha hispida* and its application in blood  
503 compatibility. *J Photochem Photobiol B Biol*. Elsevier B.V; 2018;182: 52–61.  
504 doi:10.1016/j.jphotobiol.2018.03.018
- 505 [37]. Shahverdi AR, Fakhimi A, Shahverdi HR, Minaian S. Synthesis and effect of silver  
506 nanoparticles on the antibacterial activity of different antibiotics against *Staphylococcus*  
507 *aureus* and *Escherichia coli*. *Nanomedicine Nanotechnology, Biol Med*. 2007;3: 168–  
508 171. doi:10.1016/j.nano.2007.02.001
- 509 [38]. Siddiqi KS, Husen A, Rao RAK. A review on biosynthesis of silver nanoparticles and  
510 their biocidal properties. *J Nanobiotechnology*. BioMed Central; 2018;16.  
511 doi:10.1186/s12951-018-0334-5
- 512 [39]. Simpson RJ. SDS-PAGE of Proteins. *Cold Spring Harb Protoc*. 2006: pdb.prot4313.  
513 doi:10.1101/pdb.prot4313
- 514 [40]. Singh P, Kim YJ, Singh H, Wang C, Hwang KH, Farh ME, Chun DY. Biosynthesis,  
515 characterization, and antimicrobial applications of silver nanoparticles. *Int J*  
516 *Nanomedicine*. 2015;10: 2567–2577. doi:10.2147/IJN.S72313

- 517 [41]. Soman S, Ray JG. Silver nanoparticles synthesized using aqueous leaf extract of  
518 *Ziziphus oenoplia* (L.) Mill: Characterization and assessment of antibacterial activity. J  
519 Photochem Photobiol B Biol. Elsevier B.V.; 2016;163: 391–402.  
520 doi:10.1016/j.jphotobiol.2016.08.033
- 521 [42]. Sri Ramkumar SR, Sivakumar N, Selvakumar G, Selvankumar T, Sudhakar C, Ashok  
522 kumar B, Karthi S. Green synthesized silver nanoparticles from: *Garcinia imberti*  
523 bourd and their impact on root canal pathogens and HepG2 cell lines. RSC Adv. Royal  
524 Society of Chemistry; 2017;7: 34548–34555. doi:10.1039/c6ra28328d
- 525 [43]. Tóth IY. Silver nanoparticles : aggregation behavior in biorelevant conditions and its  
526 impact on biological activity. Int J Nanomedicine. 2019;14: 667–687.
- 527 [44]. Usha Rani S, Jeeva Pandian K, Reddy BSR. Syntheses and characterisation of silver  
528 nanoparticles in the acrylate copolymers. J Exp Nanosci. 2009;4: 285–299.  
529 doi:10.1080/17458080903115338
- 530 [45]. Varadavenkatesan T, Selvaraj R, Vinayagam R. Green synthesis of silver nanoparticles  
531 using *Thunbergia grandiflora* flower extract and its catalytic action in reduction of  
532 Congo red dye. Mater Today Proc. Elsevier Ltd; 2019; 10–13.  
533 doi:10.1016/j.matpr.2019.05.441
- 534 [46]. Veerasamy R, Xin TZ, Gunasagaran S, Xiang TFW, Yang EFC, Jeyakumar N,  
535 Arumugam DS. Biosynthesis of silver nanoparticles using mangosteen leaf extract and  
536 evaluation of their antimicrobial activities. J Saudi Chem Soc. King Saud University;  
537 2011;15: 113–120. doi:10.1016/j.jscs.2010.06.004
- 538 [47]. Wing, Ivanova EP, Nguyen SH, Webb HK, Hasan J, Truong VK. Molecular  
539 organization of the nanoscale surface structures of the dragonfly *Hemianax papuensis*  
540 wing epicuticle. PLoS One. 2013;8. doi:10.1371/journal.pone.0067893
- 541 [48]. Yugandhar P, Haribabu R, Savithramma N. Synthesis, characterization and  
542 antimicrobial properties of green-synthesised silver nanoparticles from stem bark  
543 extract of *Syzygium alternifolium* (Wt.) Walp. 3 Biotech. Springer Berlin Heidelberg;  
544 2015;5: 1031–1039. doi:10.1007/s13205-015-0307-4
- 545 [49]. Zhang QX, Zhang Y, Shan HH, Tong YH, Chen XJ, Liu FQ. Isolation and  
546 identification of antifungal peptides from *Bacillus amyloliquefaciens* W10. Environ Sci  
547 Pollut Res; 2017;24: 25000–25009. doi:10.1007/s11356-017-0179-8

549 **Figure 1 (a)** *Mang Mao* insect. **(b)** (1) Silver nitrate solution; (2) *Mang Mao* wings extract;  
550 (3) Silver nanoparticles; **(c)** UV-Vis spectra of AgNPs synthesized by *Mang Mao* wings  
551 extract.

552 **Figure 2 (a)** UV-vis spectra of aqueous silver nitrate concentration. **(b)** Concentration ratio  
553 of *Mang Mao* extract with 1 mM silver nitrate. **(c)** Different pH range. **(d)** Different time  
554 intervals

555 **Figure 3** SEM images **(a)** pH-3. **(b)** pH-5. **(c)** pH-7. **(d)** pH-9. **(e)** pH-11

556 **Figure 4 (a)** Energy dispersive X-ray analysis of the synthesized MMAgNPs. **(b)** XRD  
557 pattern of biosynthesized silver nanoparticles using *Mang Mao* wings extract.

558 **Figure 5** Characterization of MMAgNPs by (a) DLS size distribution and (b) zeta potential  
559 analysis

560 **Figure 6** FTIR pattern of the *Mang Mao* wings extract and synthesized MMAgNPs

561 **Figure 7 (a)** TLC of *Mang Mao* wings extract: (1) UV visualization, (2) Ninhydrin reagent.  
562 **(b)** SDS-PAGE analysis of *Mang Mao* wings extract protein; Lane 1. Molecular size marker;  
563 lane 2. Crude protein; lane 3. Purified protein (46 kDa) responsible for active biosynthesized  
564 MMAgNPs

565 **Figure 8** Antioxidant activity: **(a)** DPPH scavenging activity. **(b)** Ferric reducing antioxidant  
566 activity.

567 **Figure 9** Antimicrobial activity of synthesized MMAgNPs

568

569

570

Fig.1

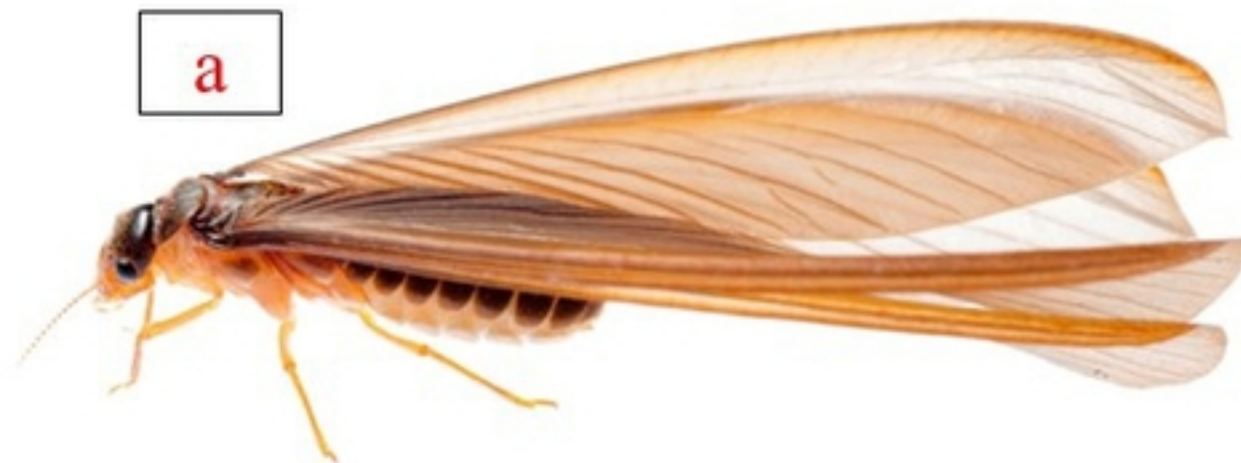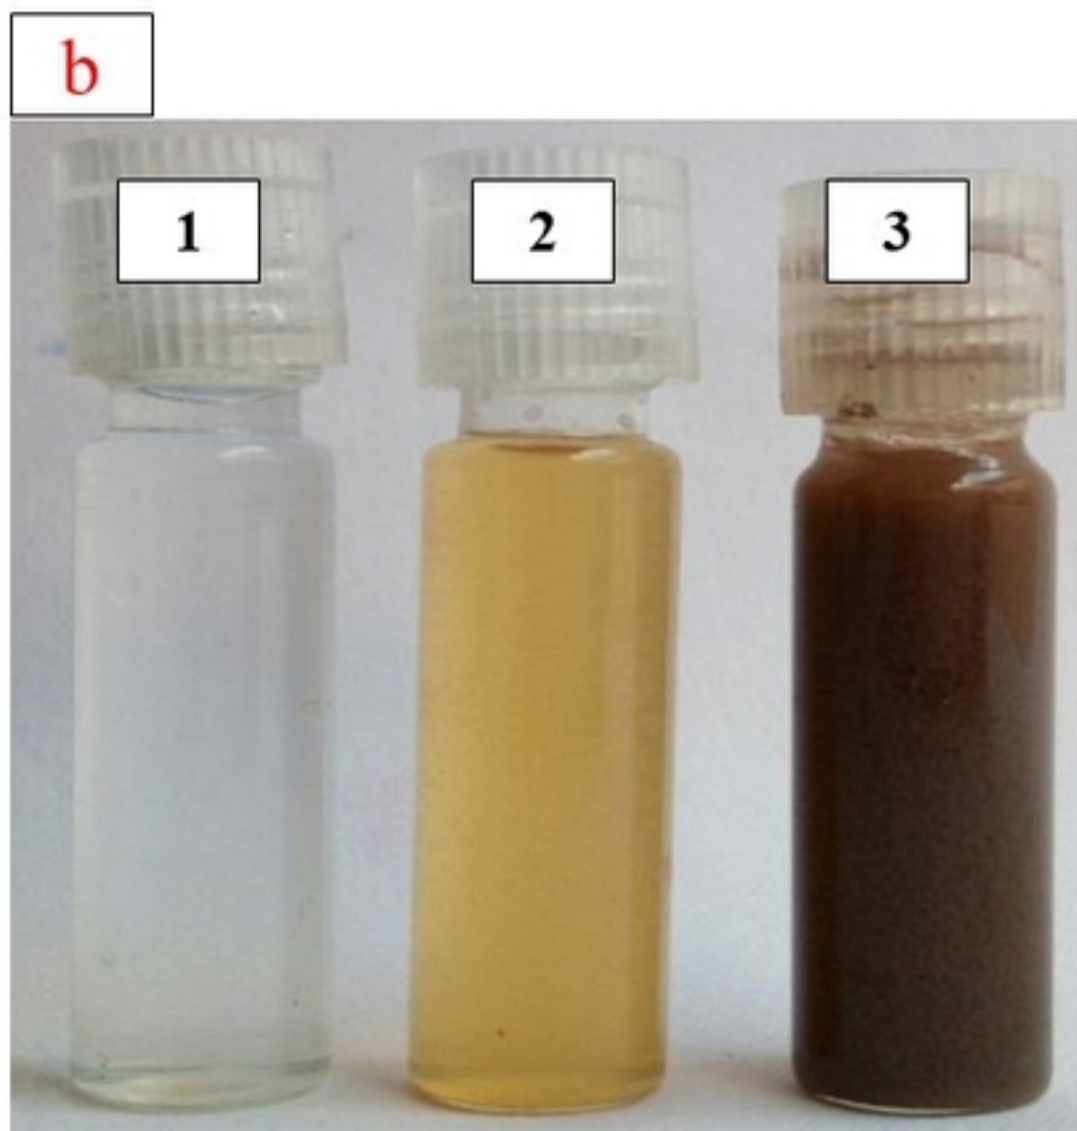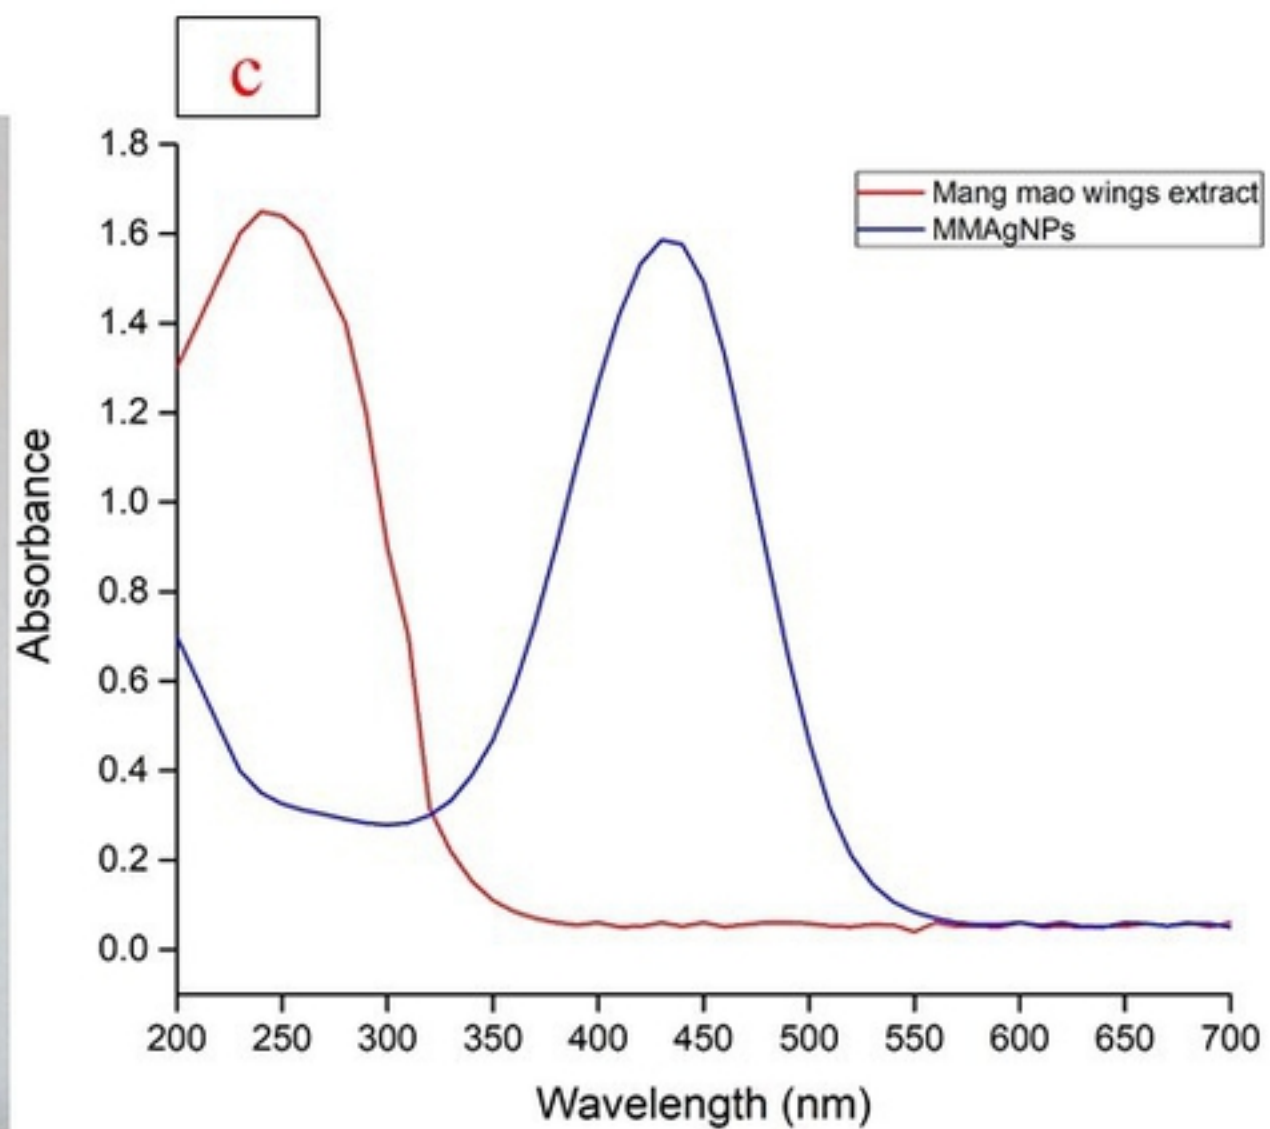

Figure 1

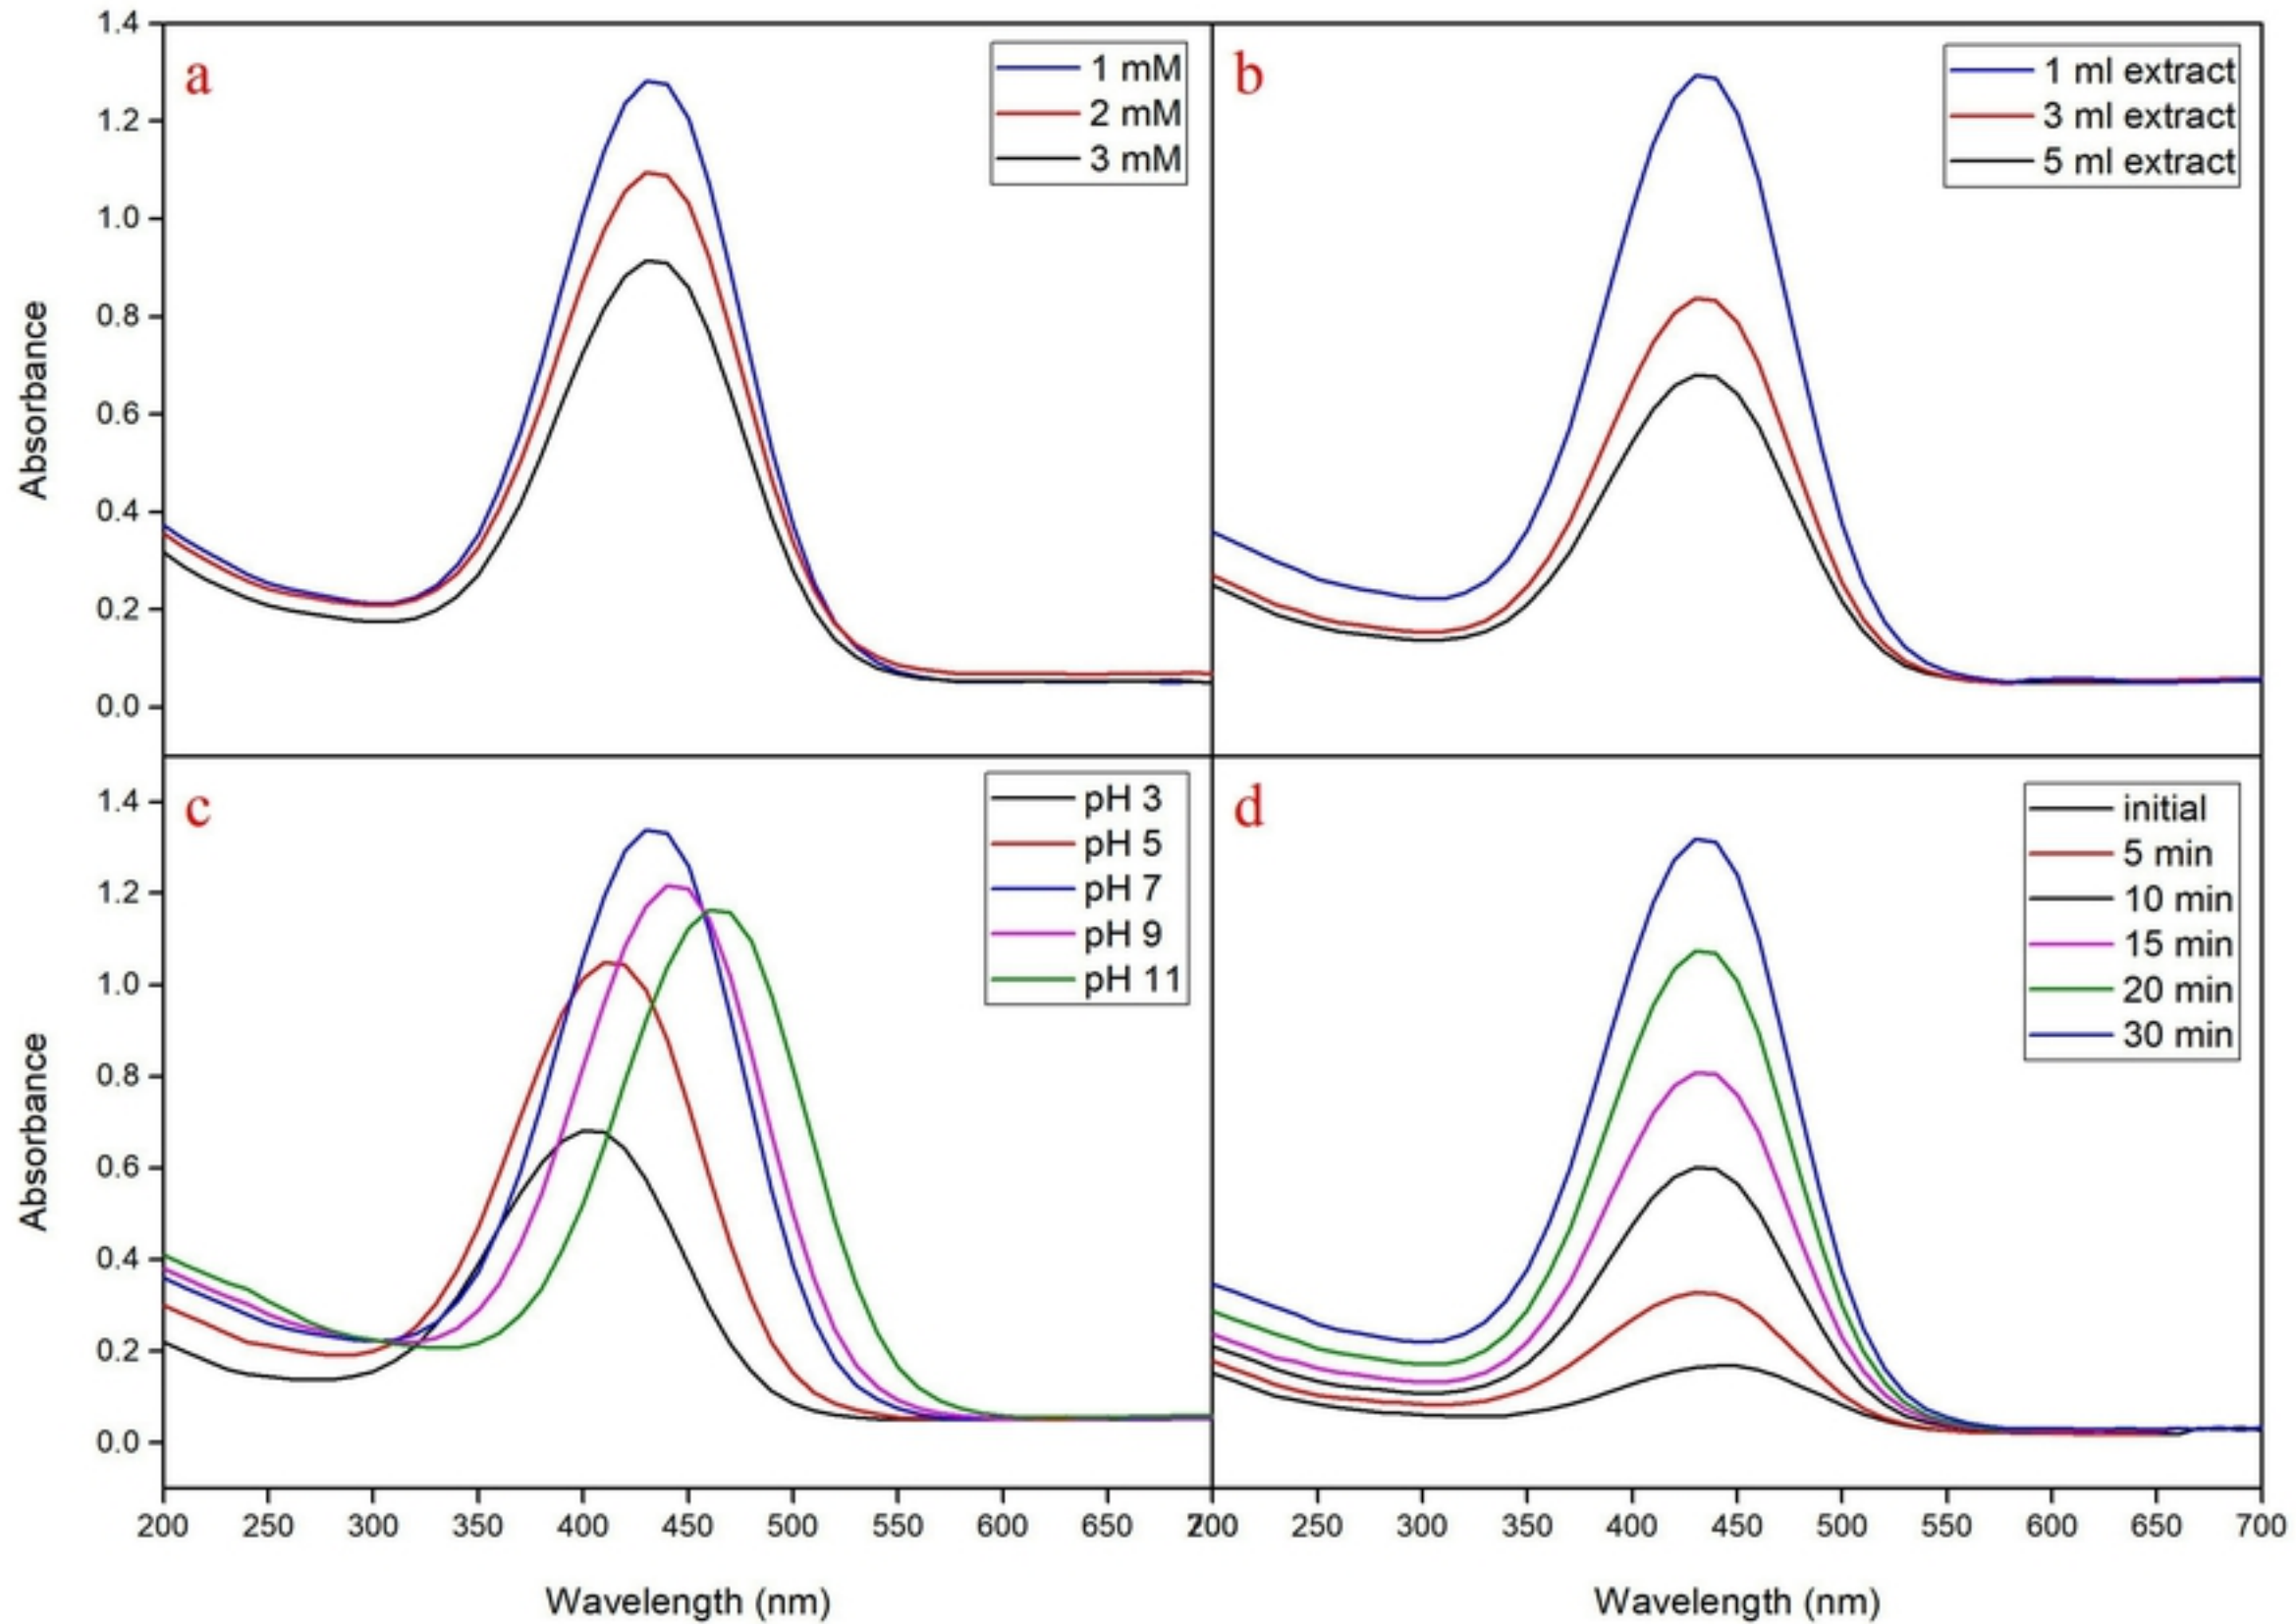

Figure 2

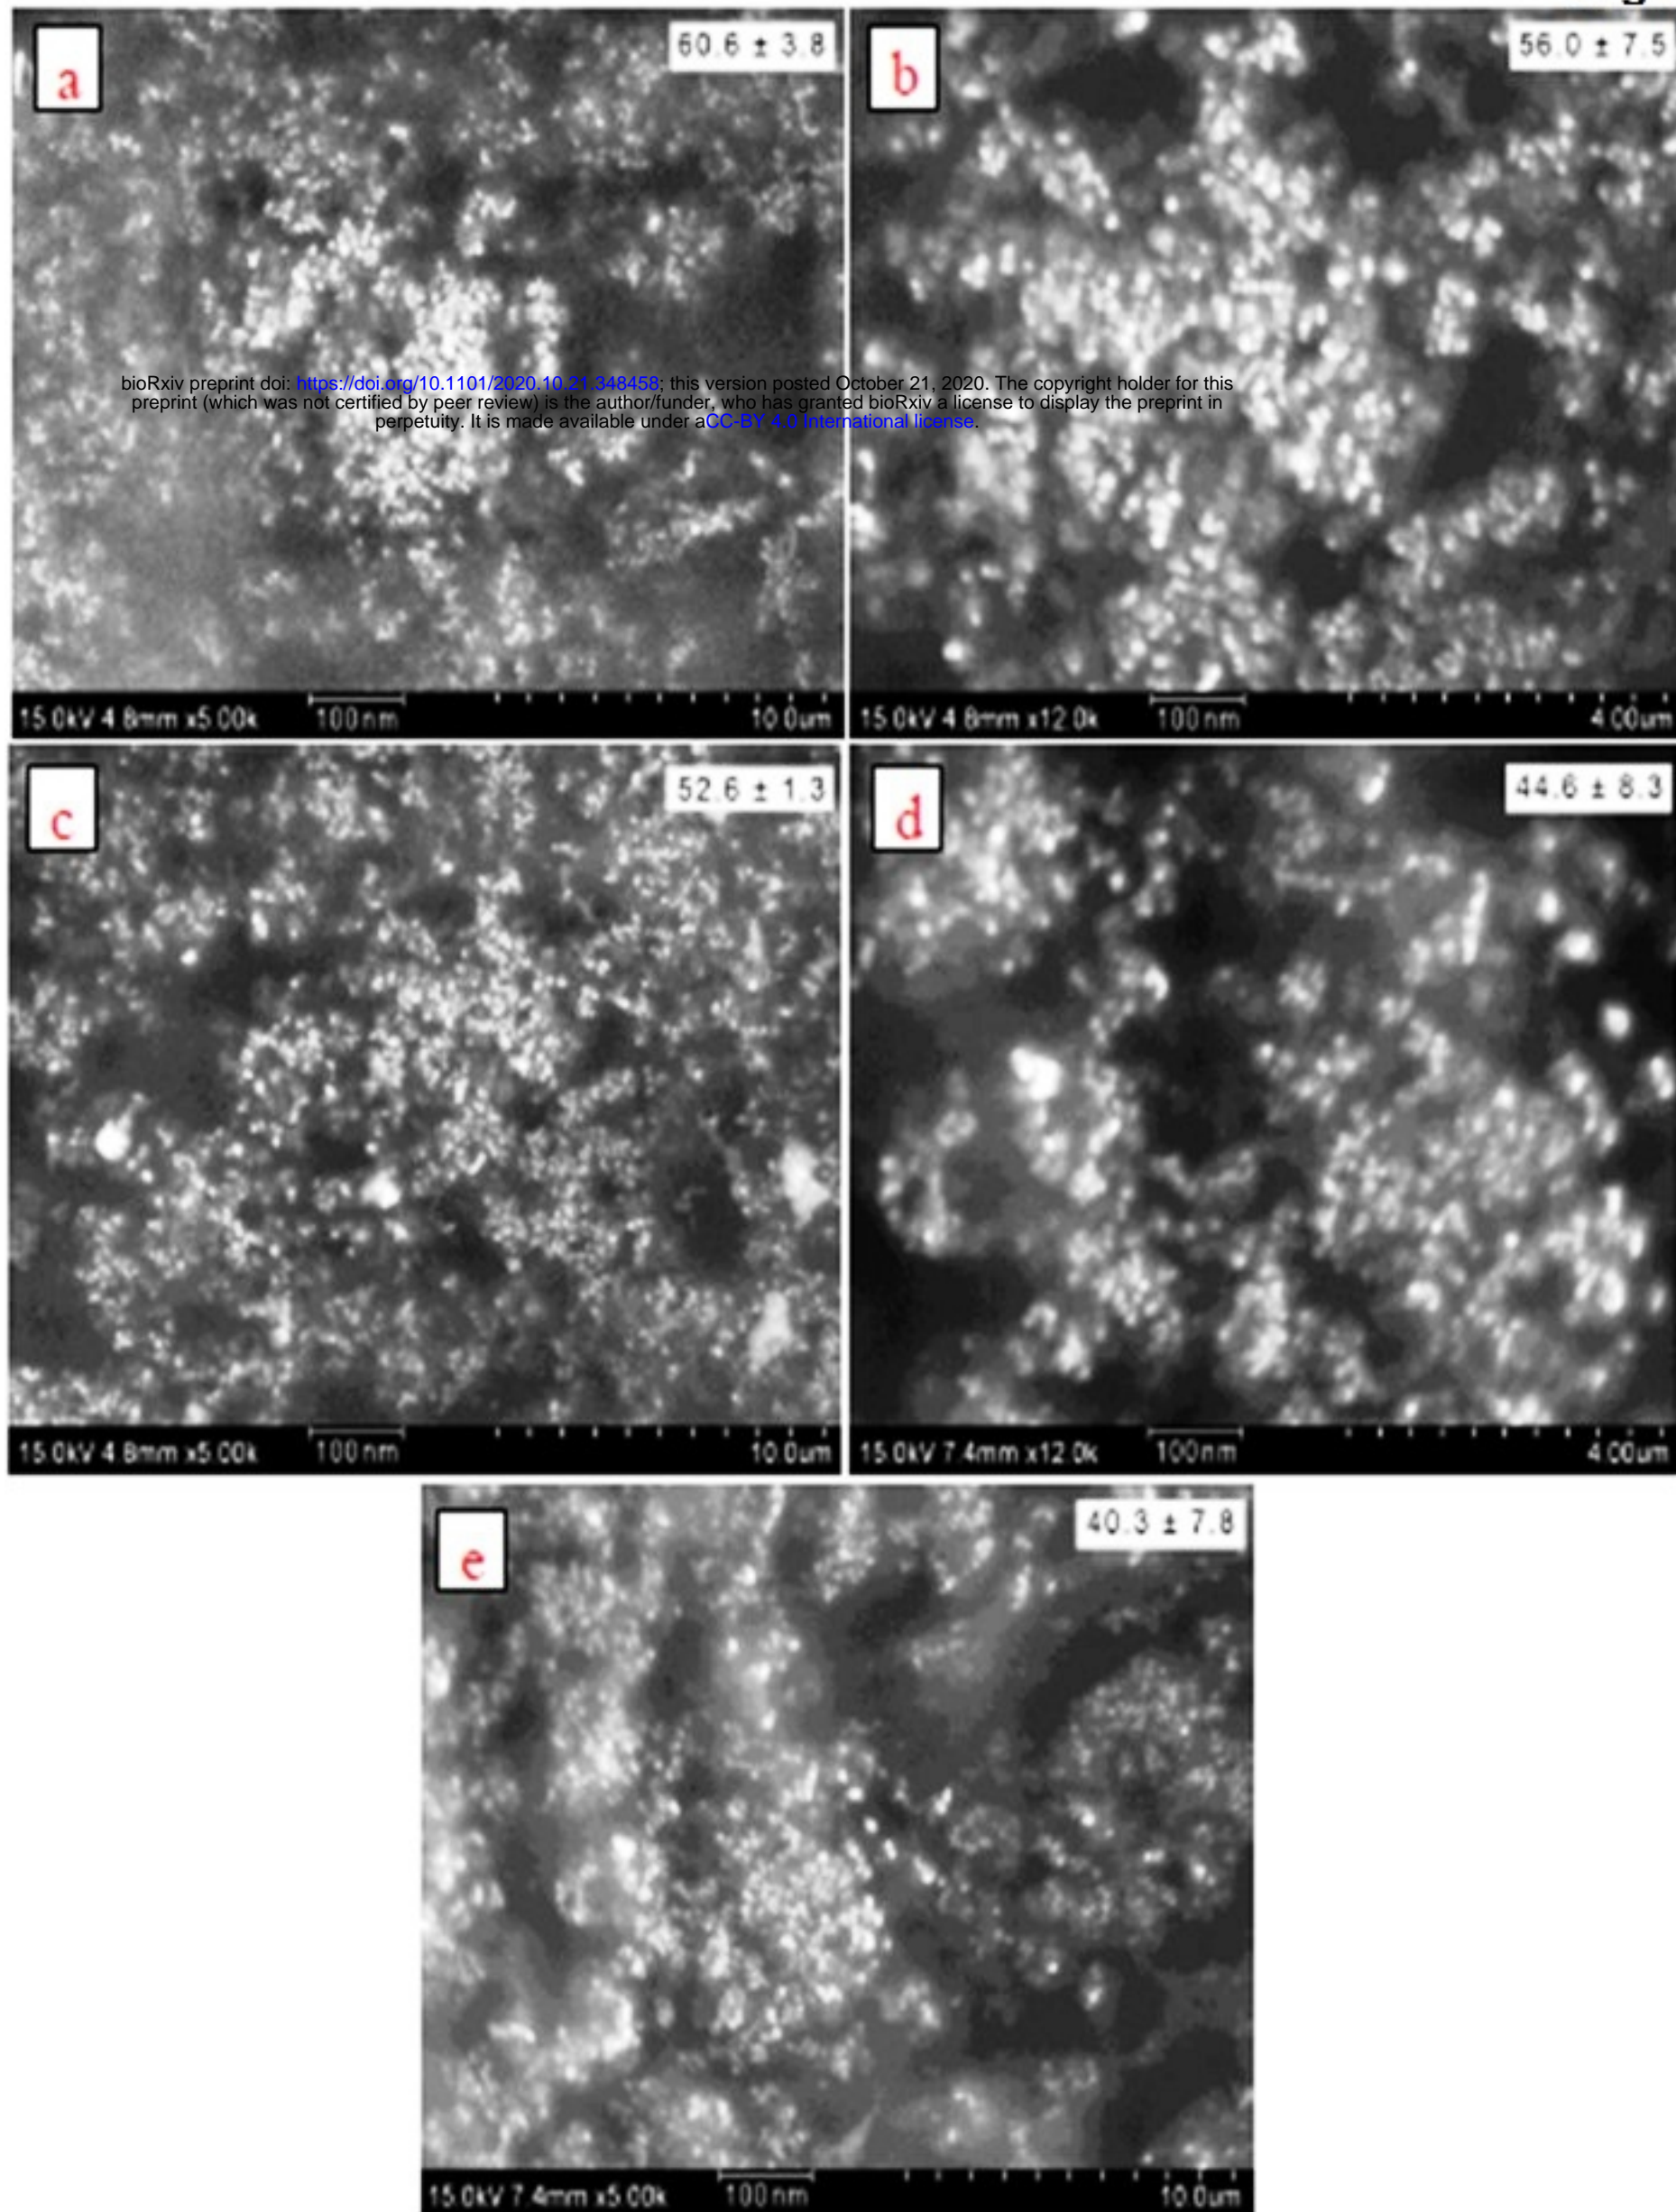

Figure 3



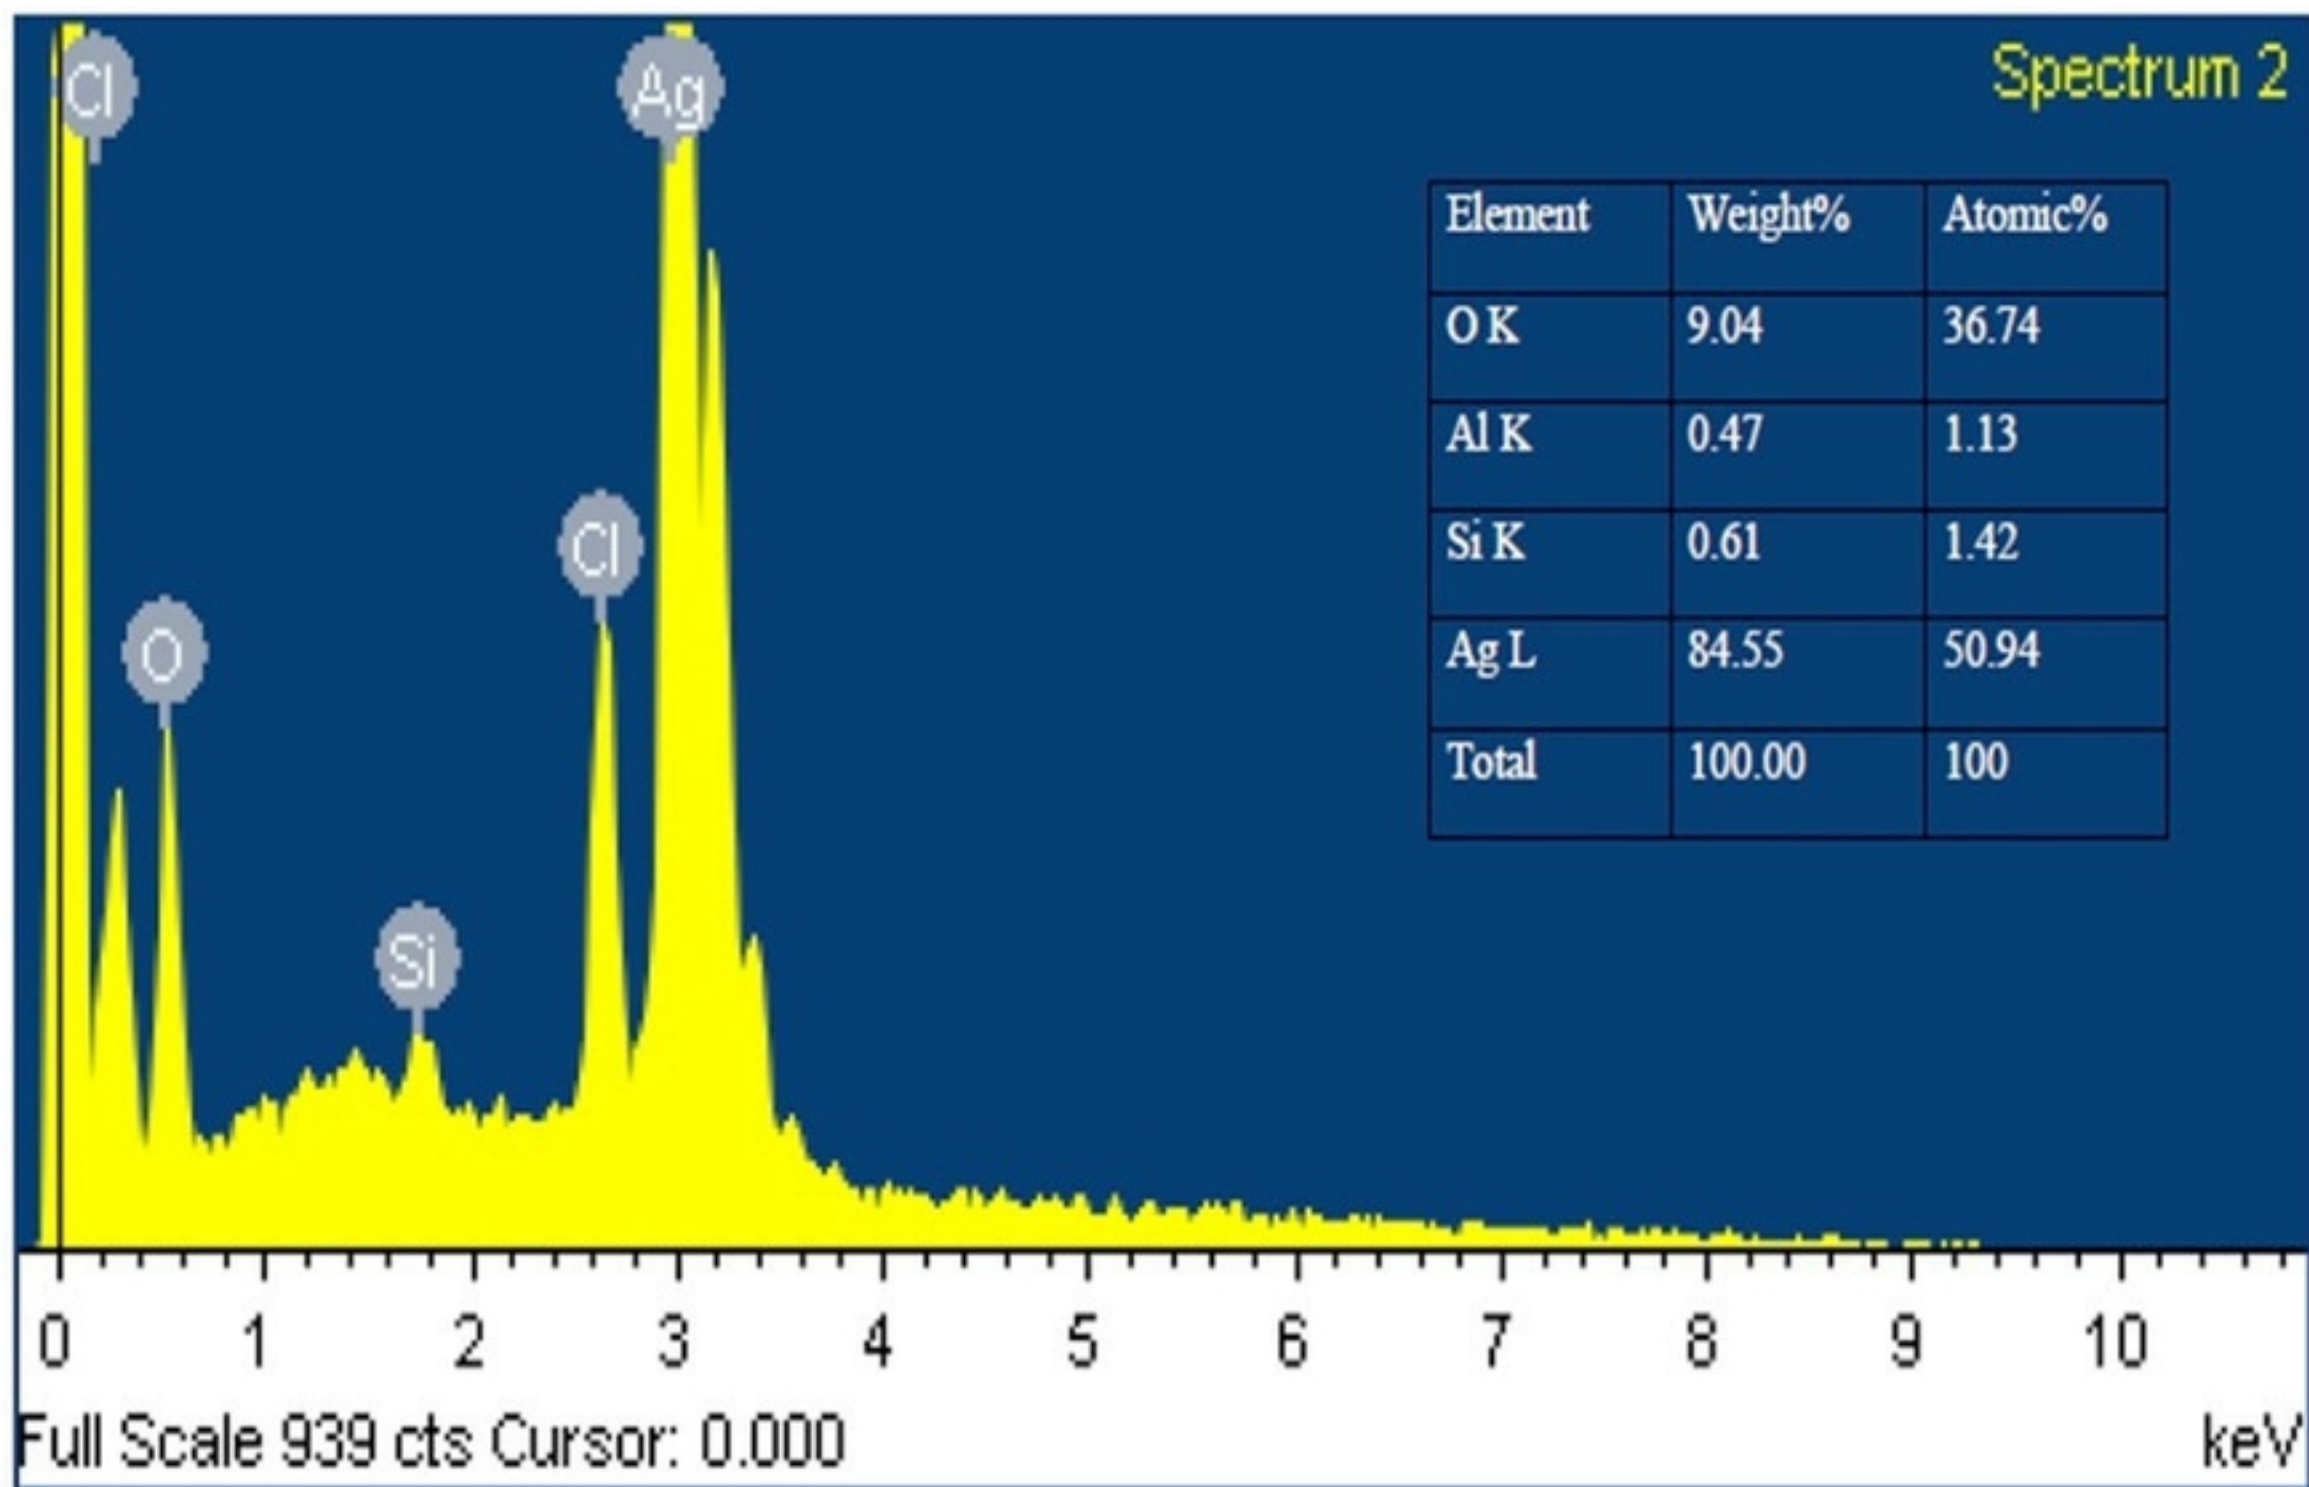

Figure 4a

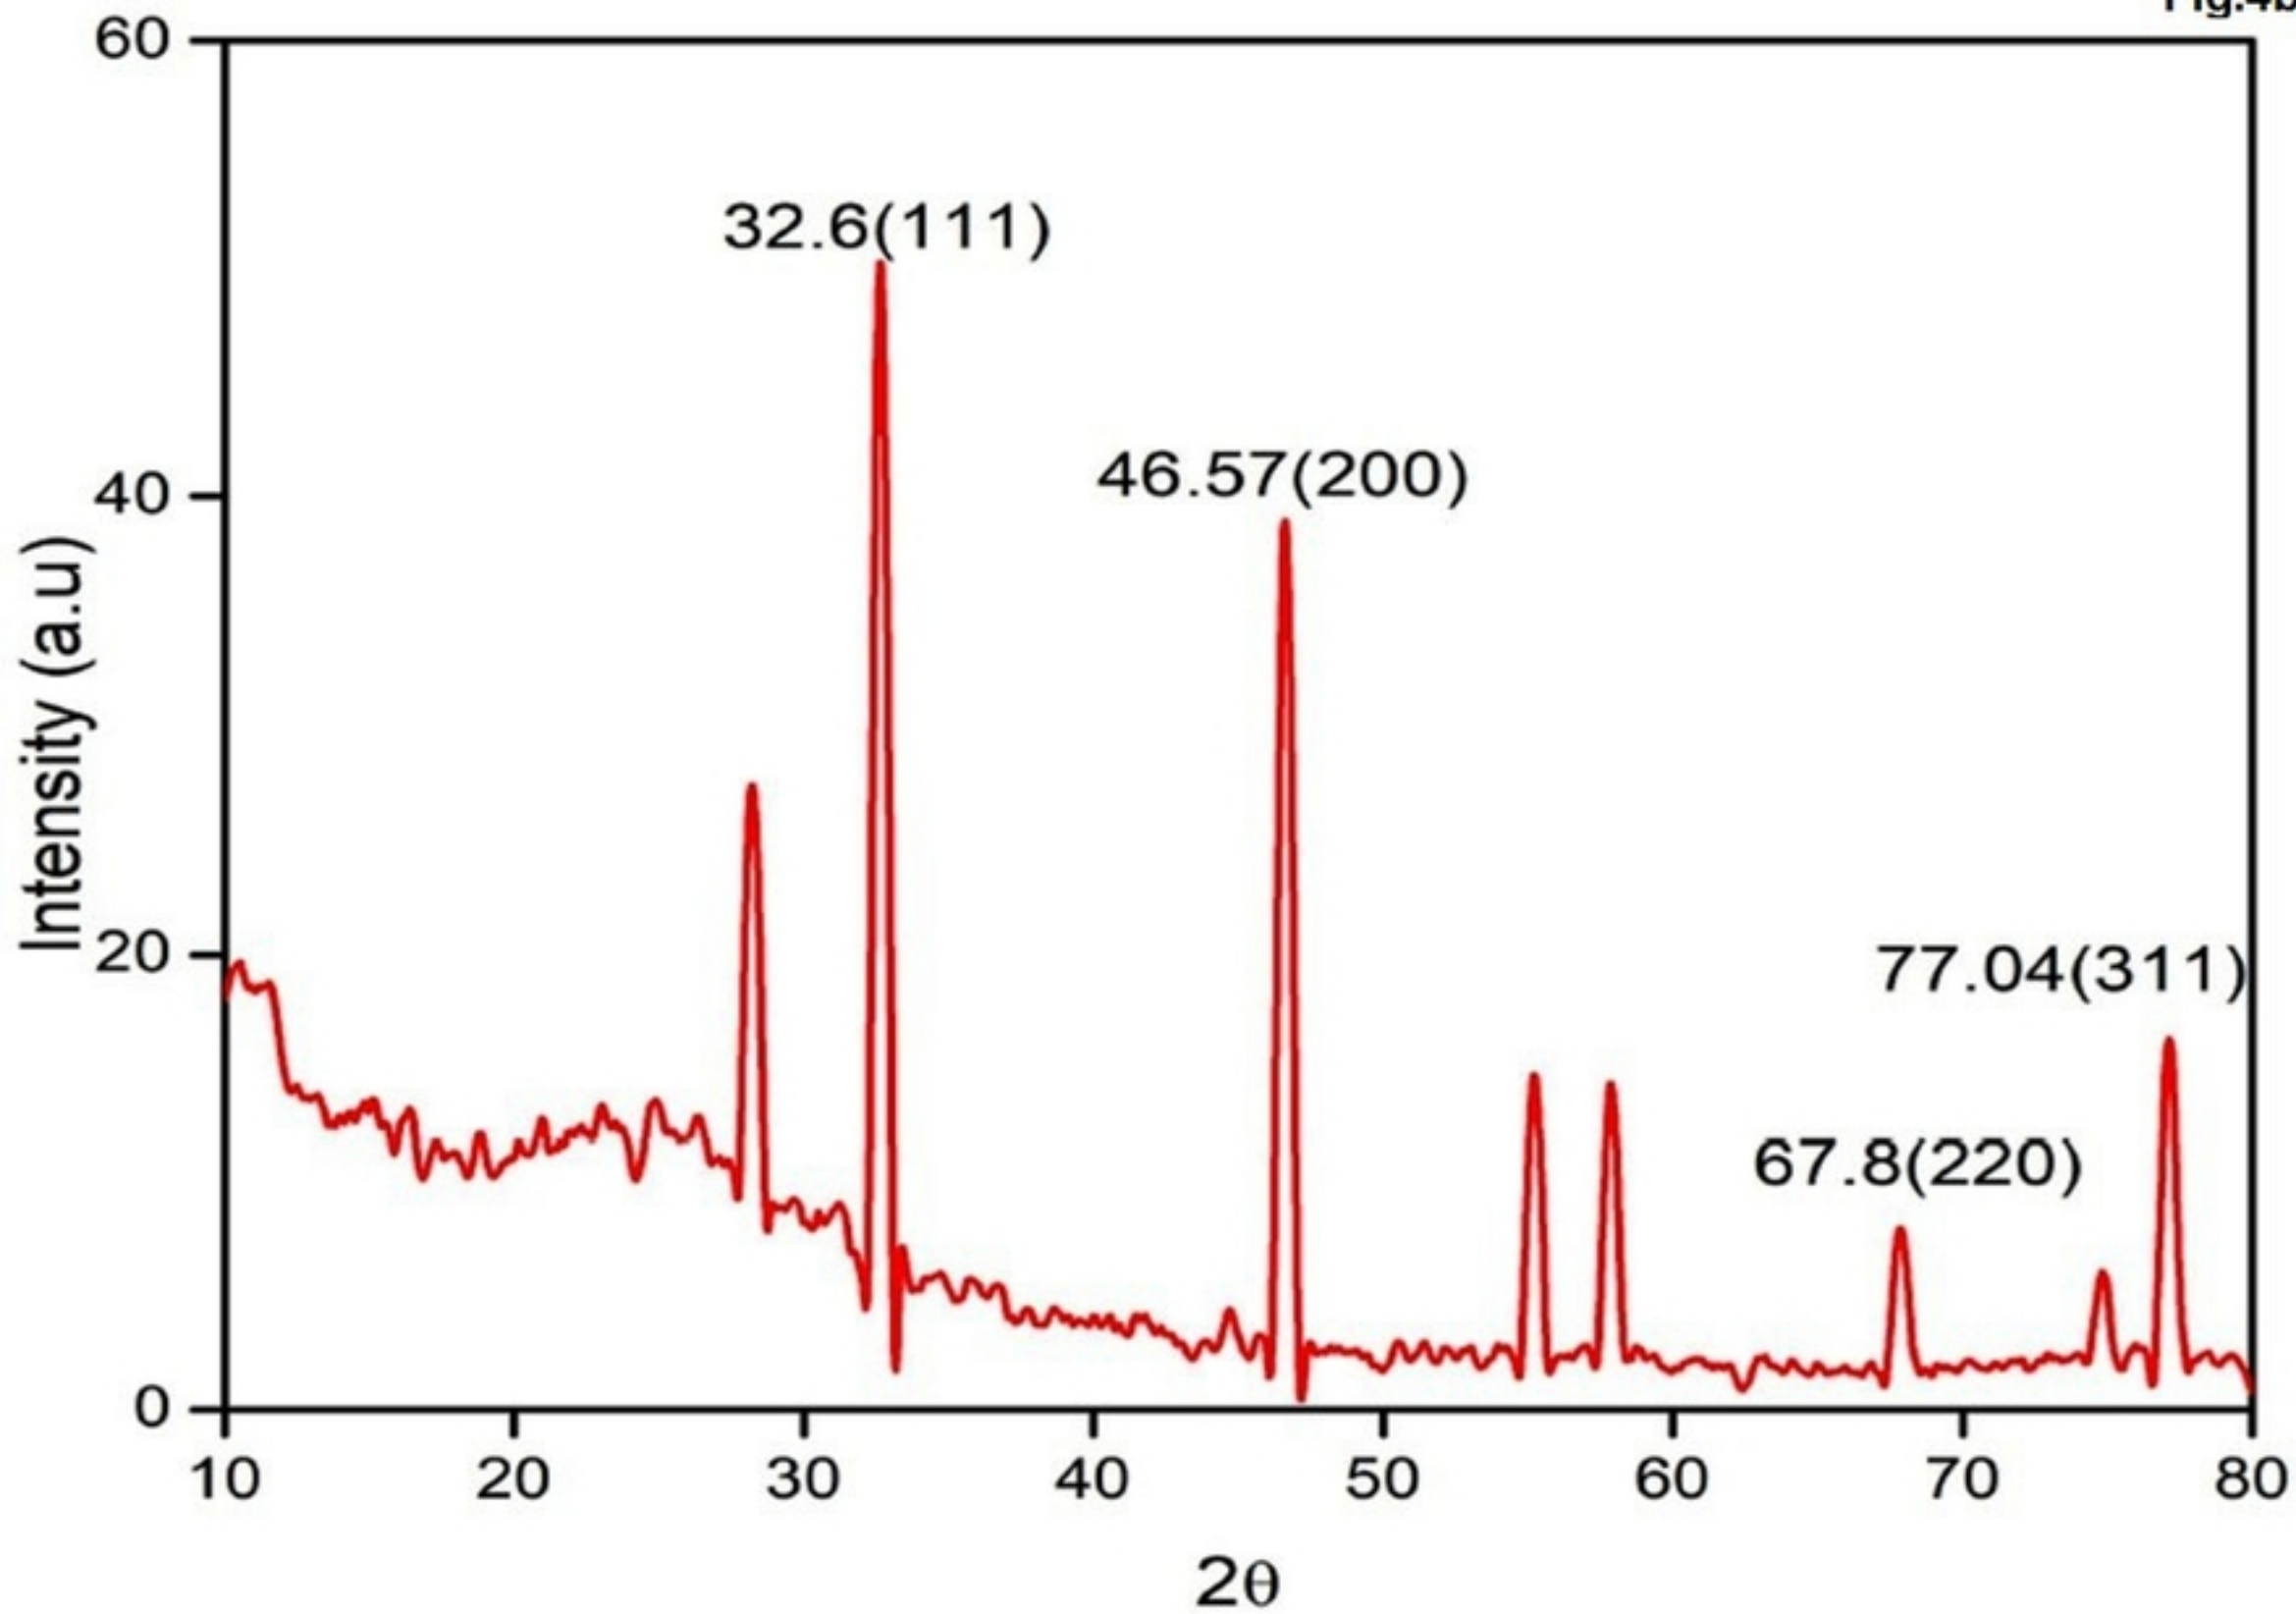

Figure 4b

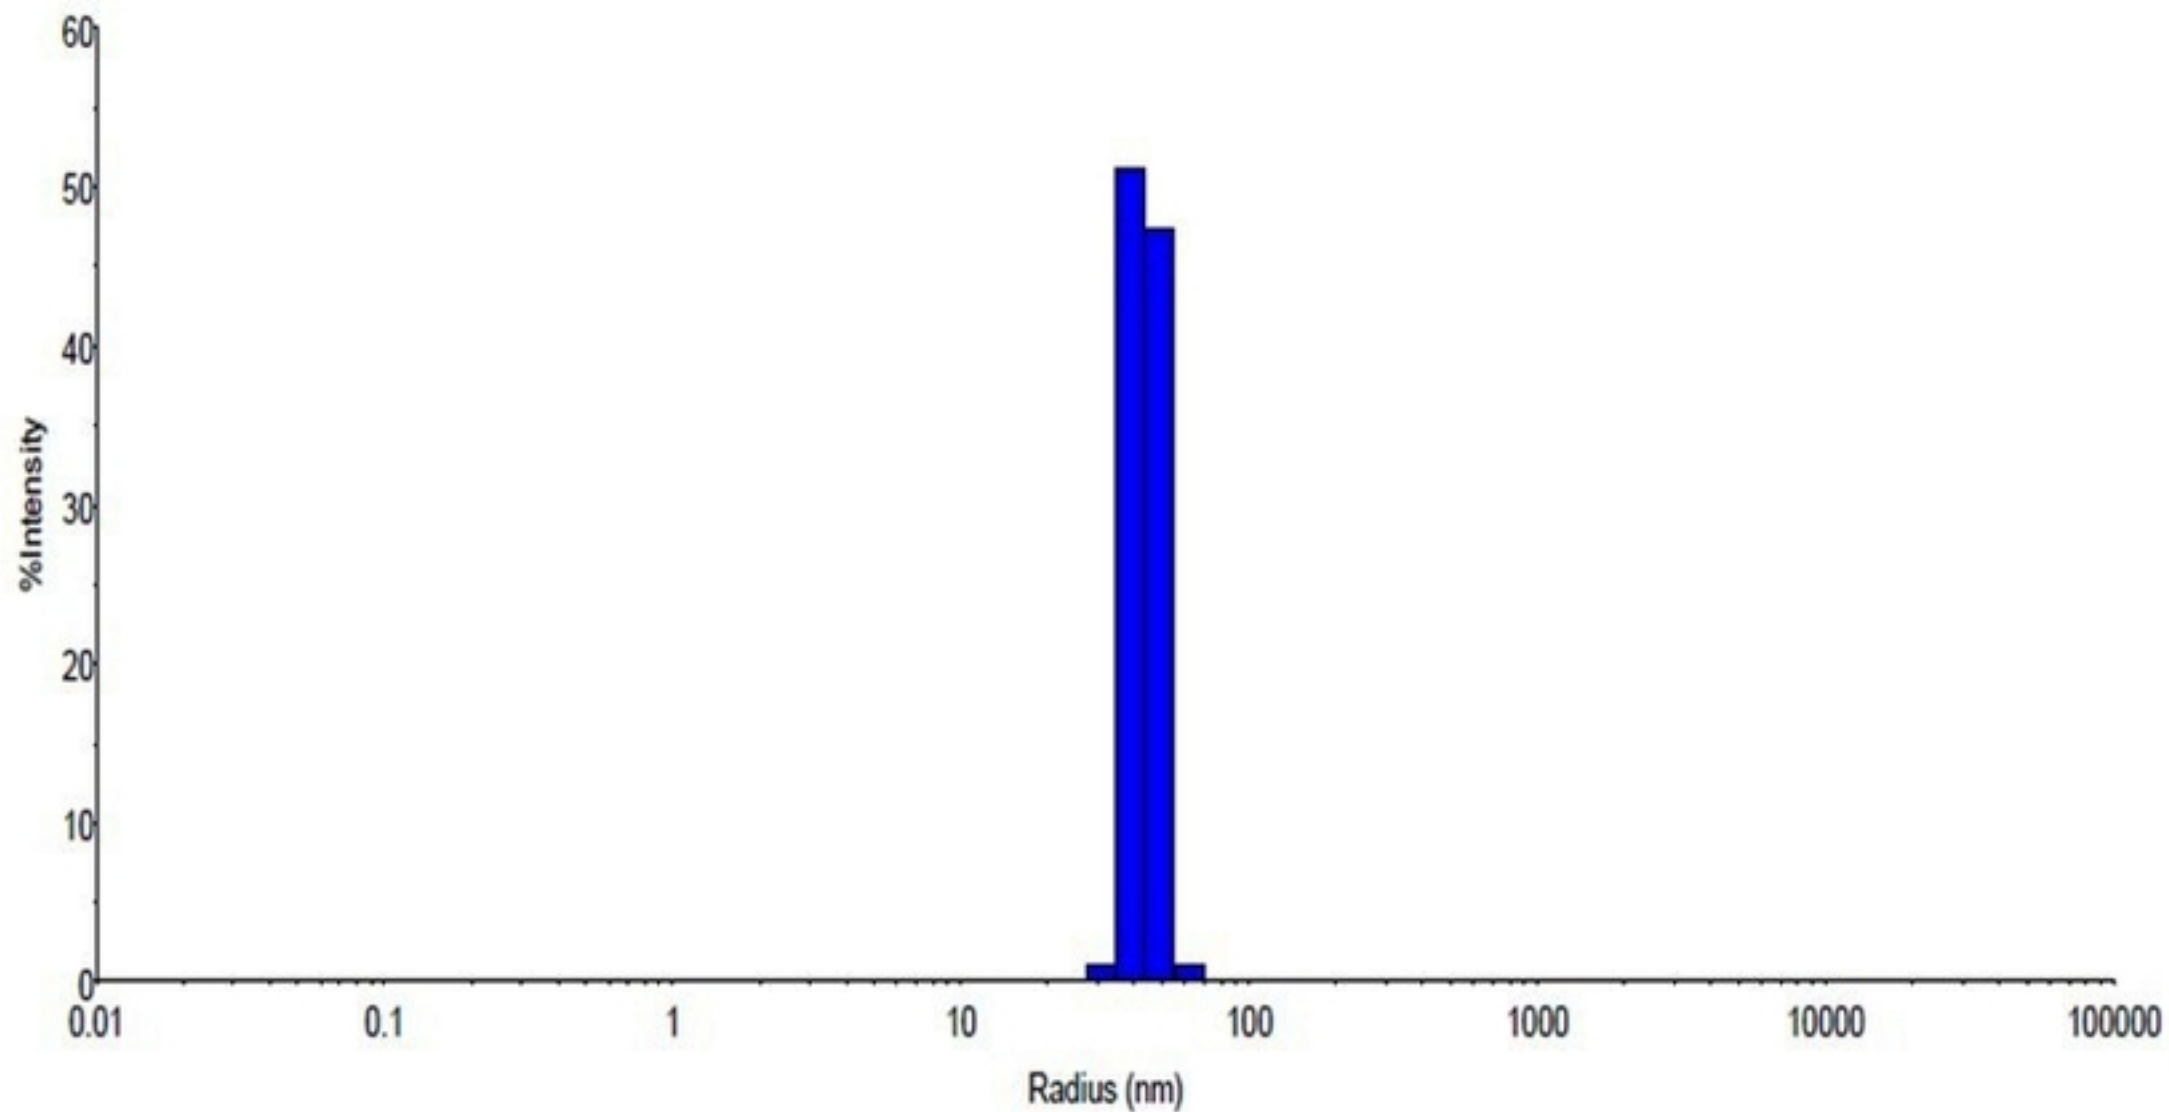

|        | Radius<br>(nm) | Mw-R<br>(kDa) | %Pd  | %Intensity | %Mass | %Number |
|--------|----------------|---------------|------|------------|-------|---------|
| Peak 1 | 43.9           | 23461.4       | 12.8 | 100.0      | 100.0 | 100.0   |

Figure 5a

Fig. 5b

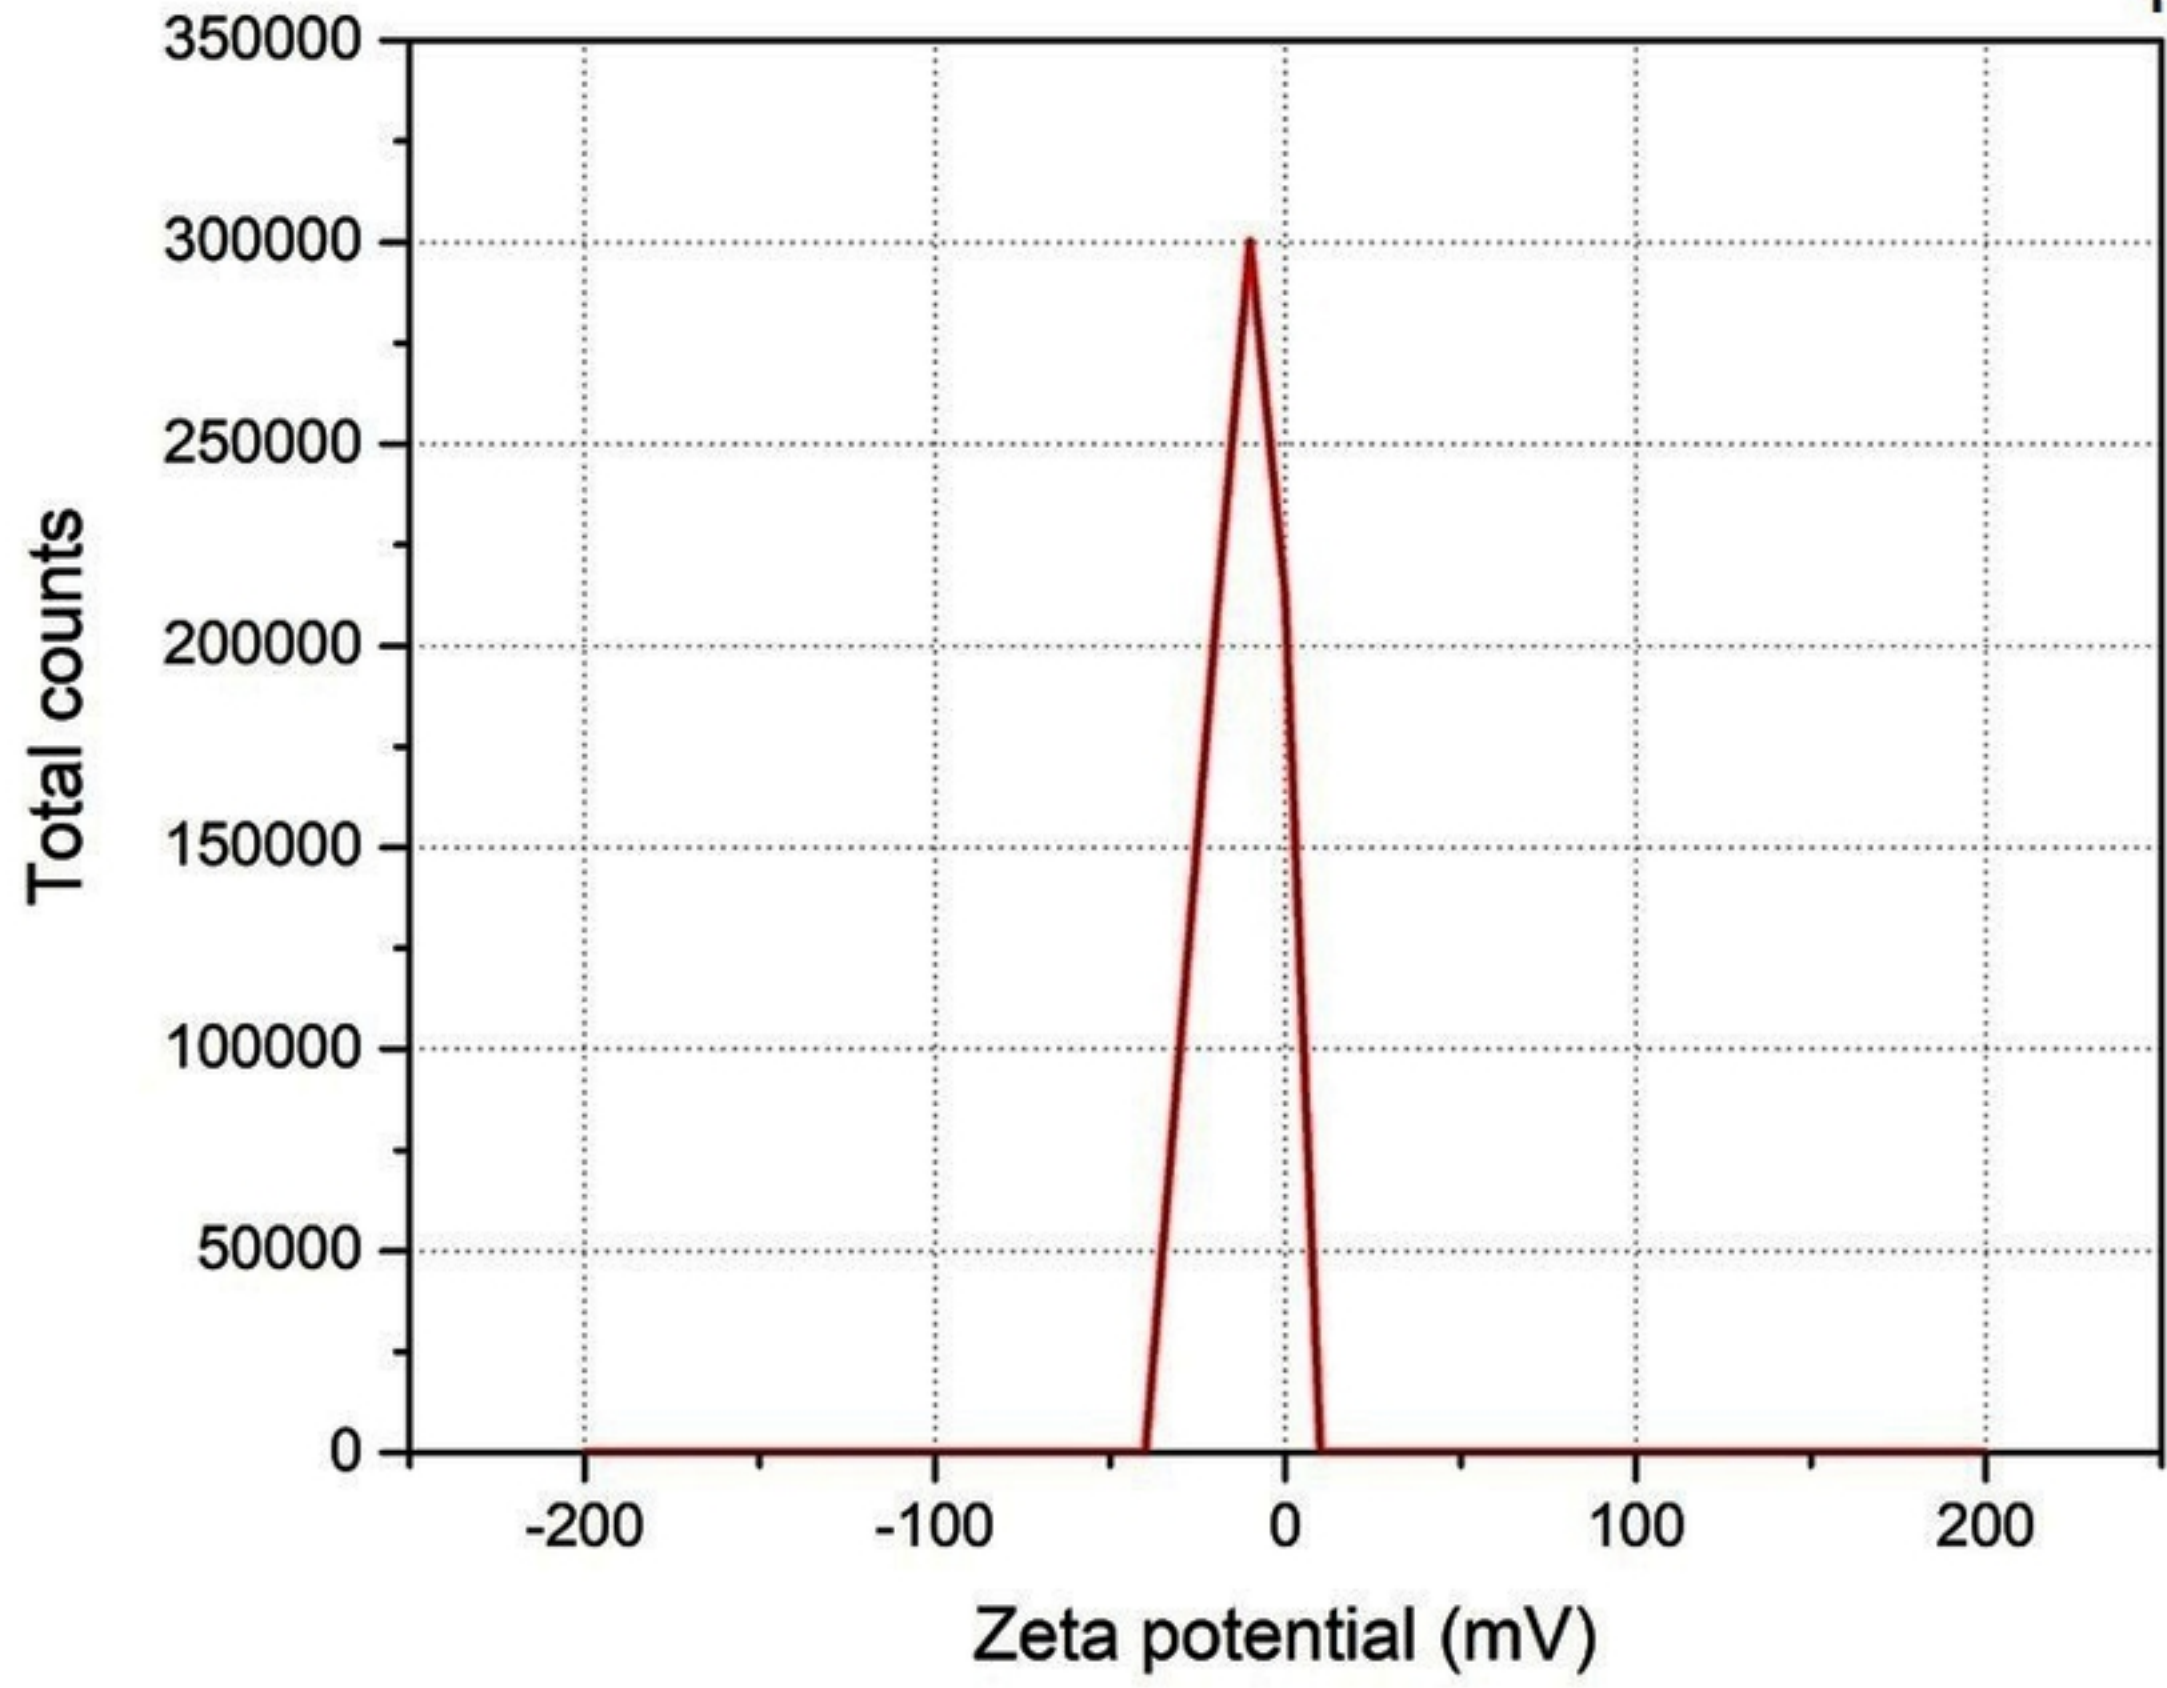

Figure 5b

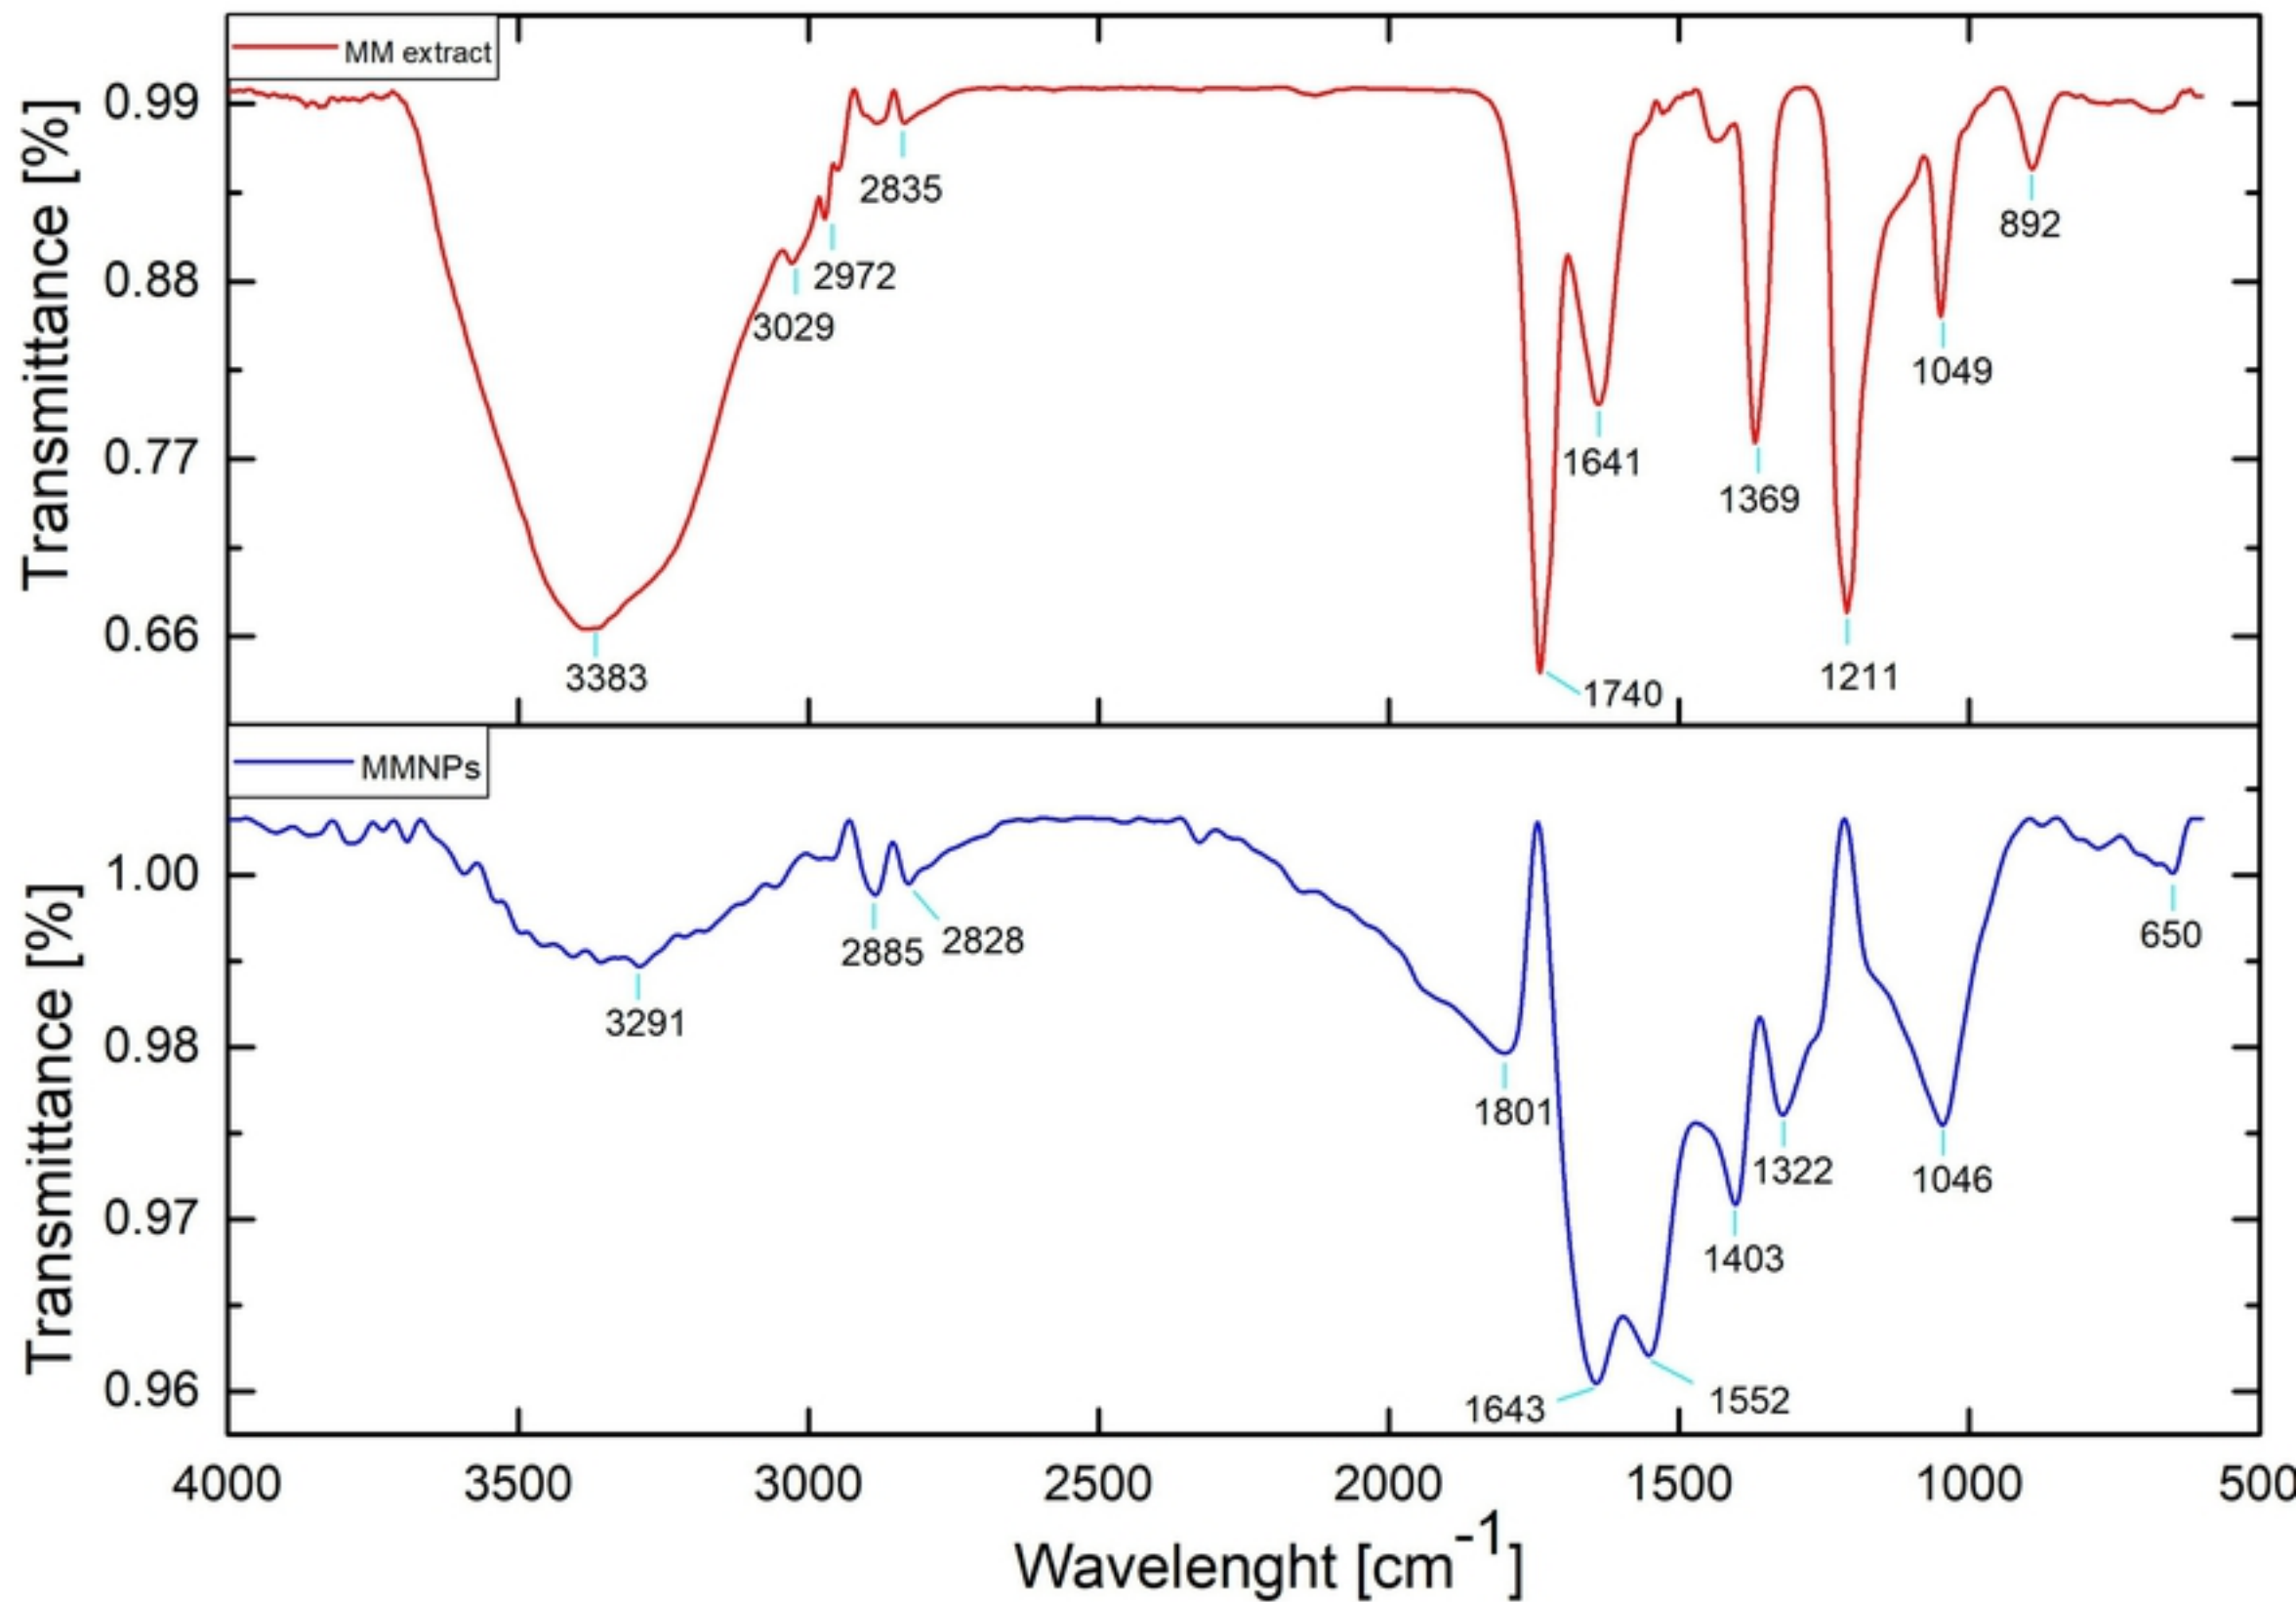

Figure 6

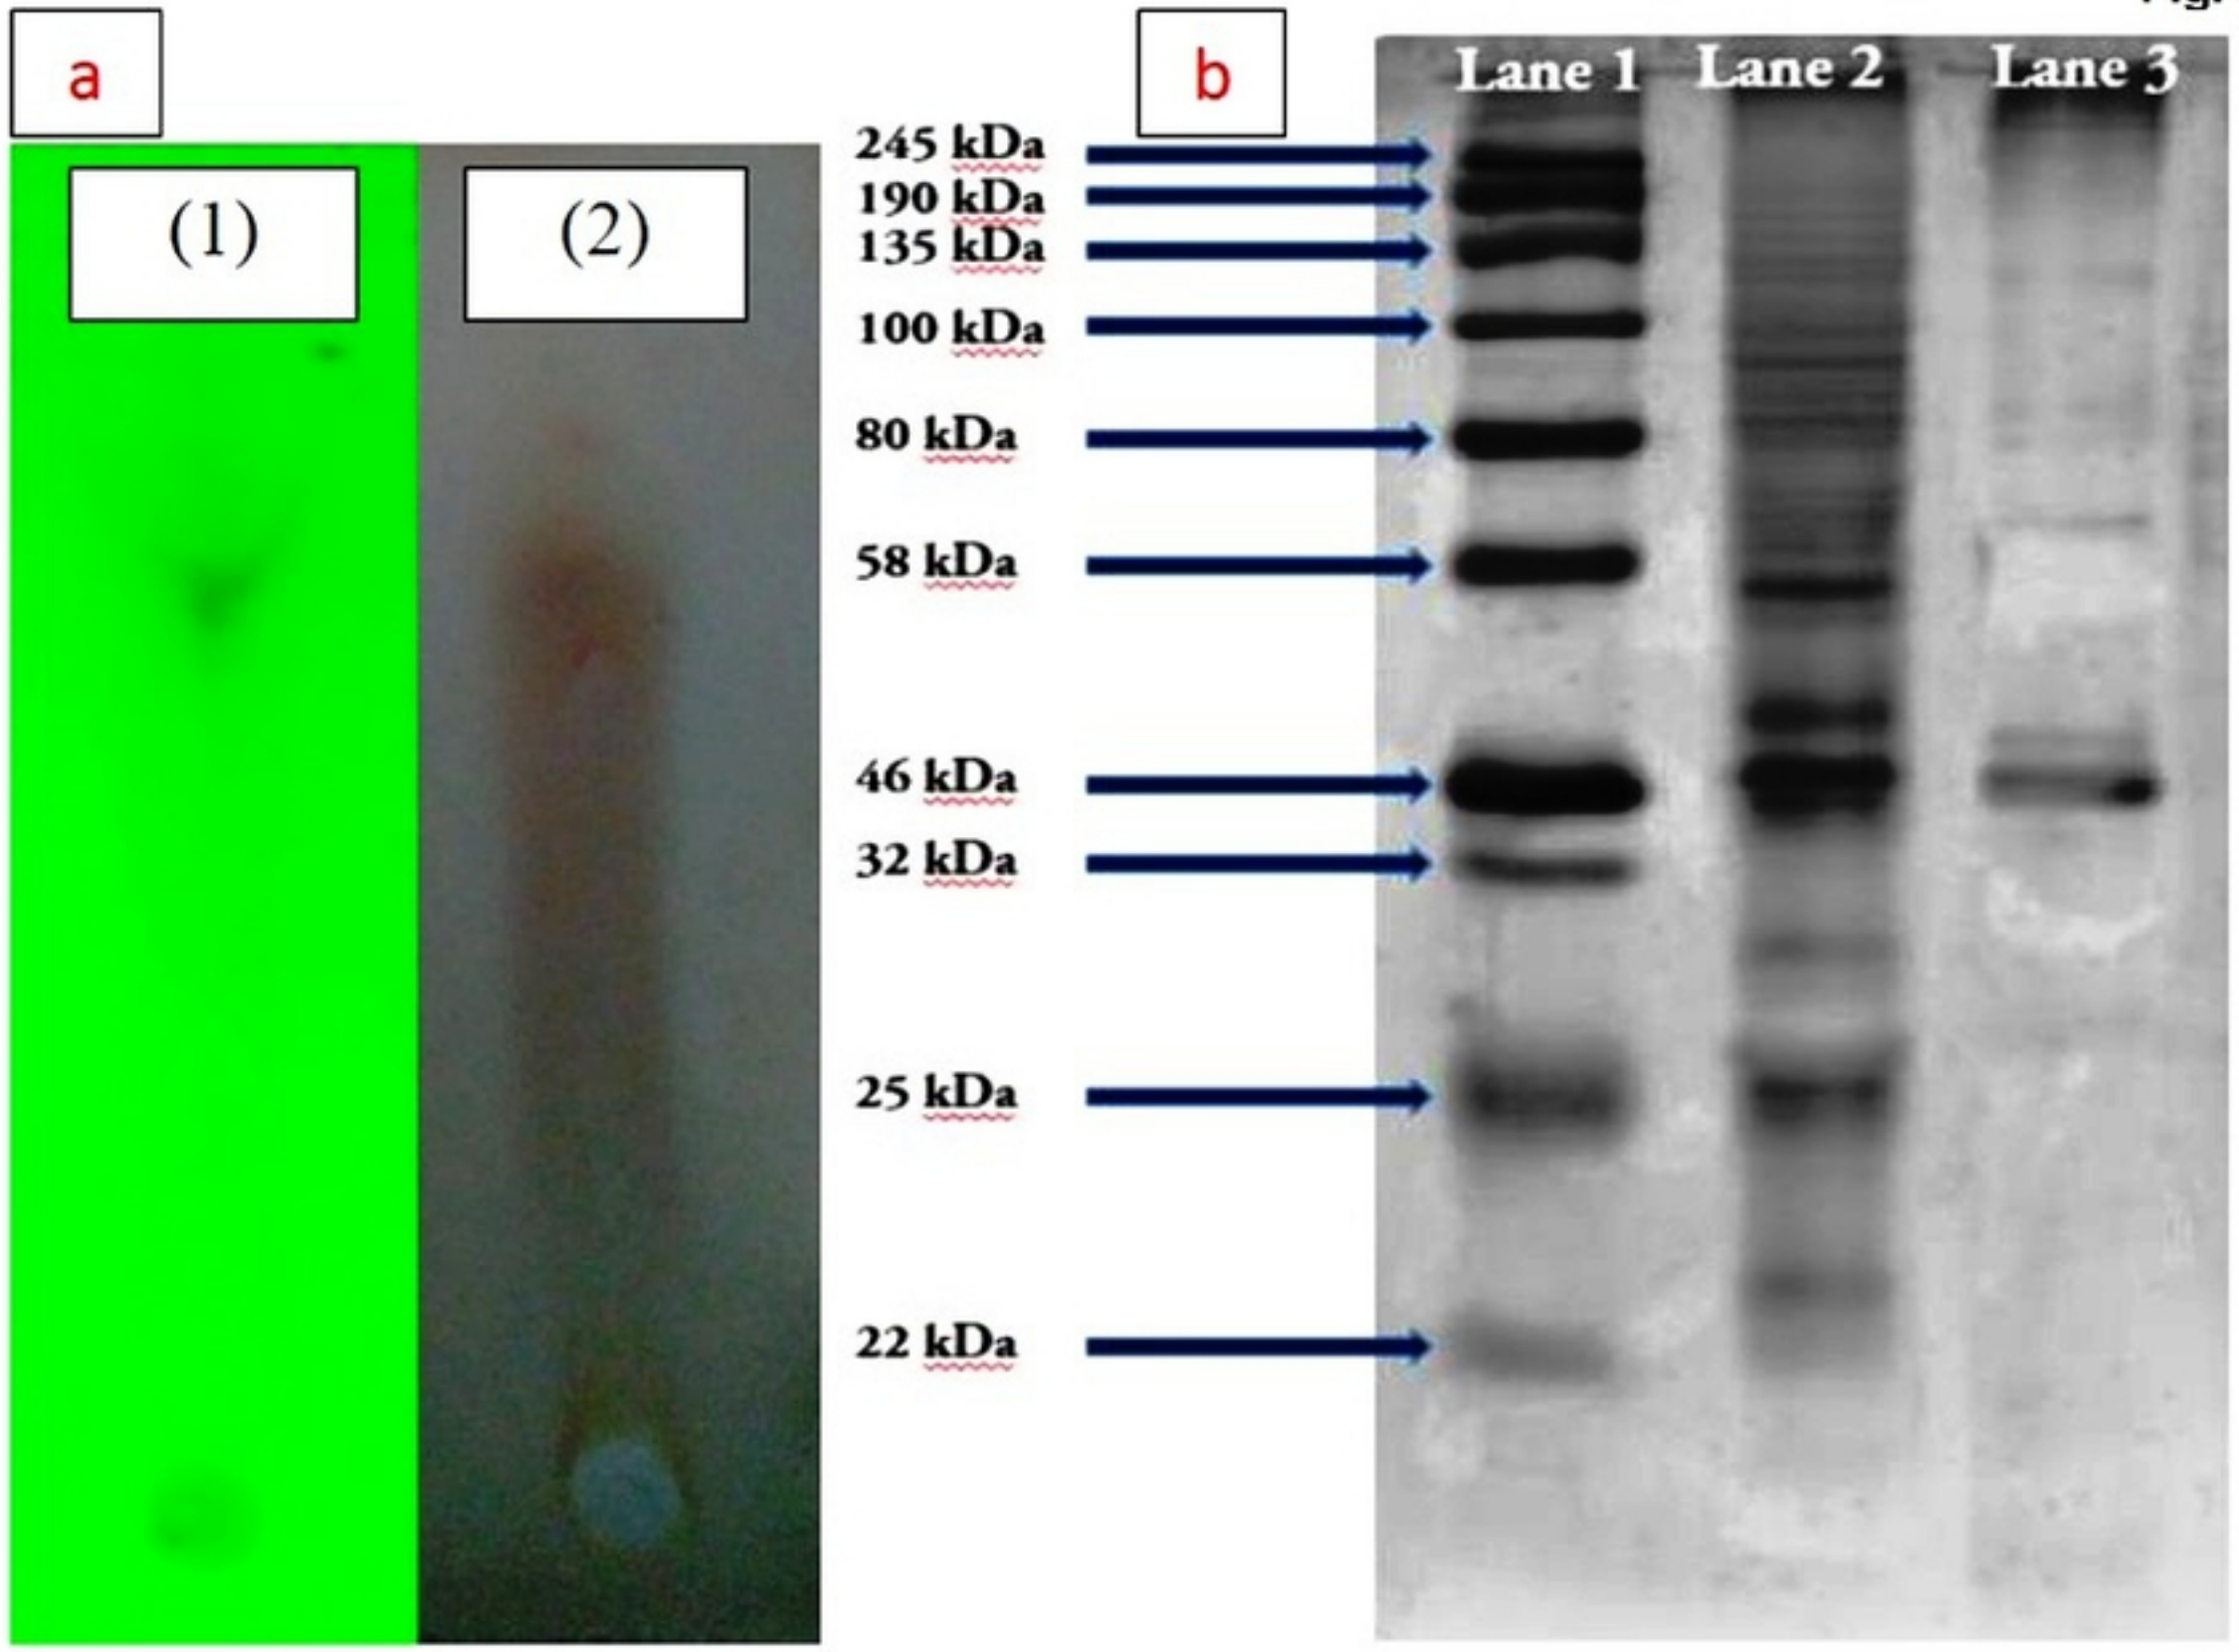

Figure 7

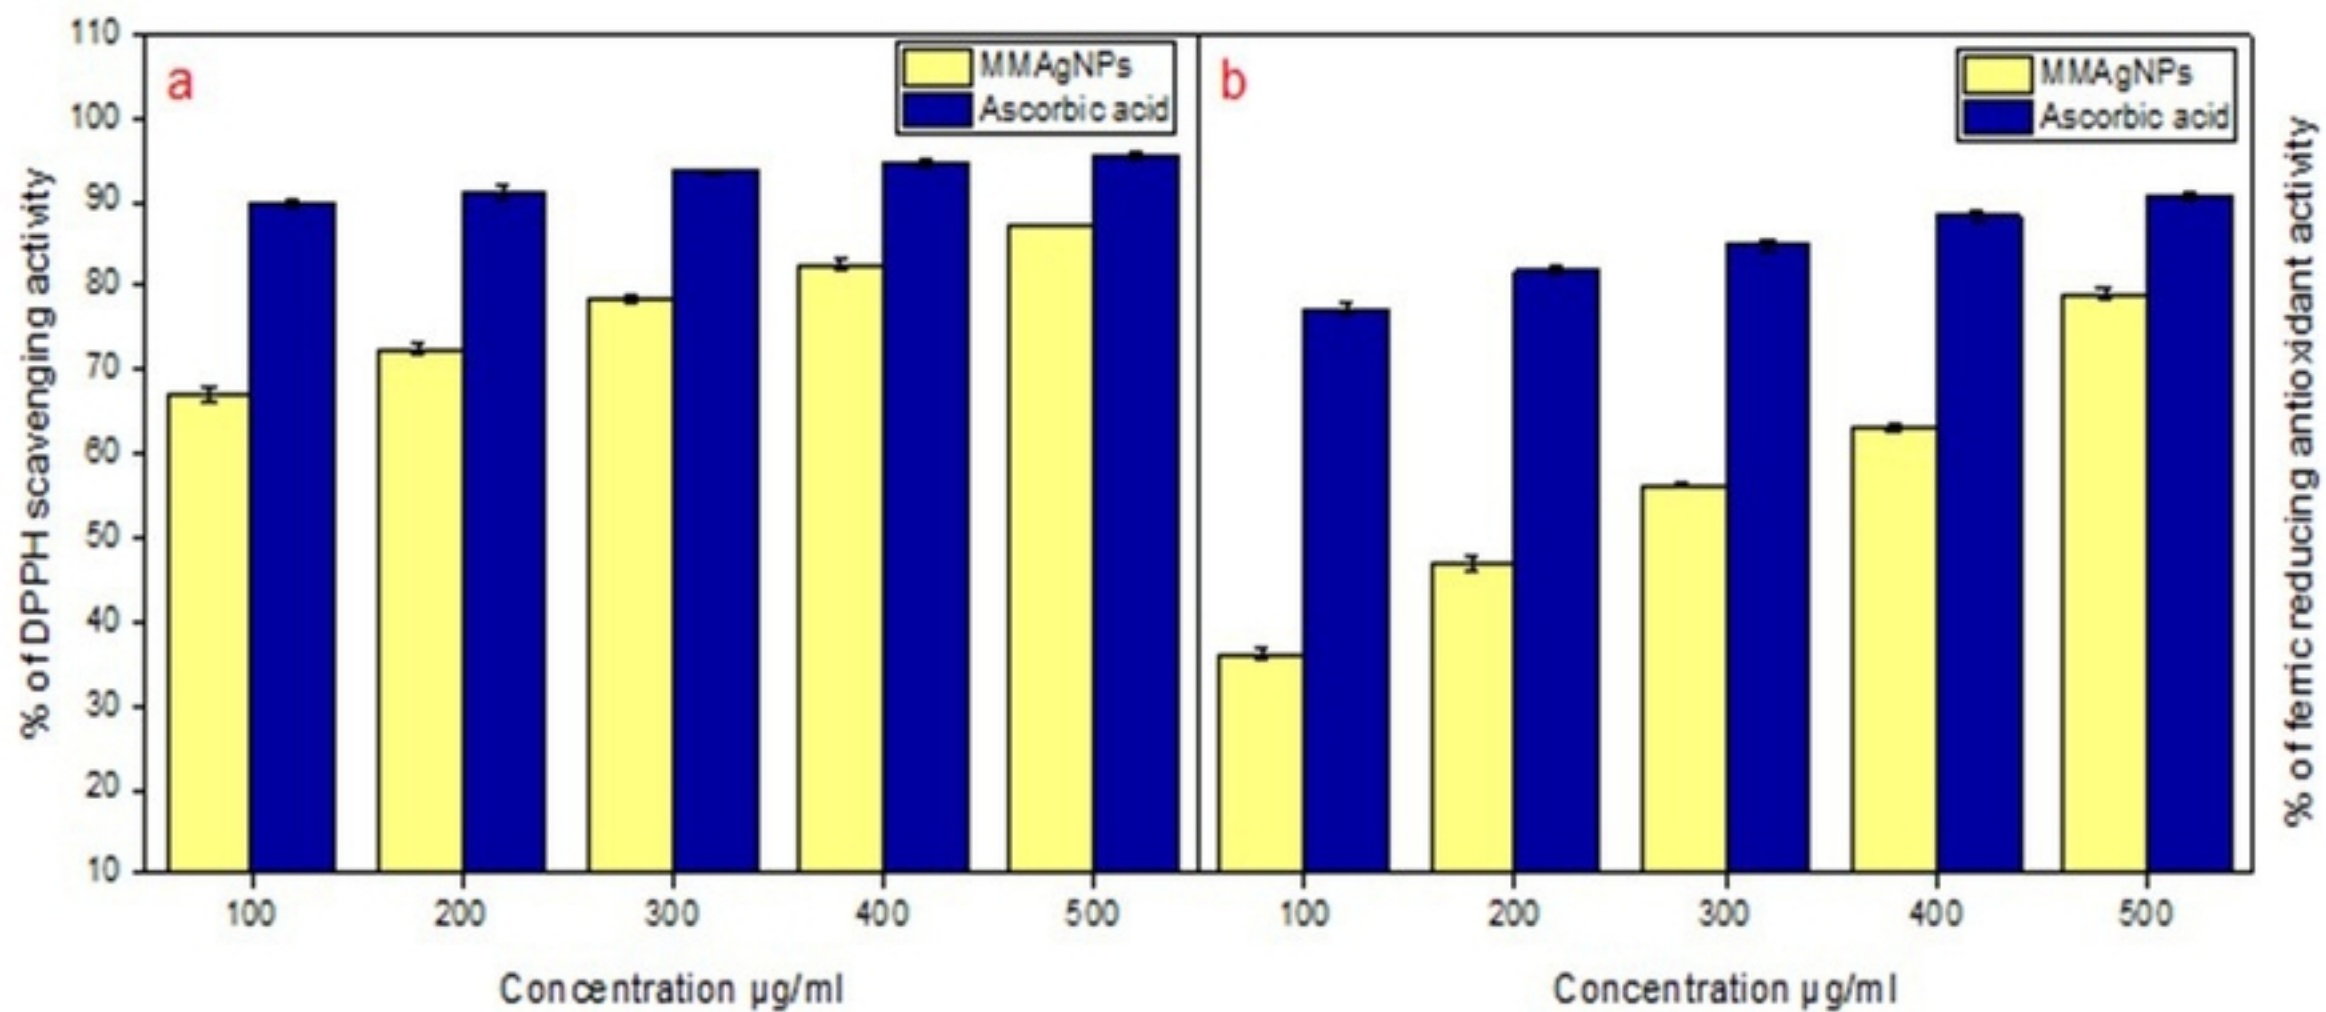

Figure 8

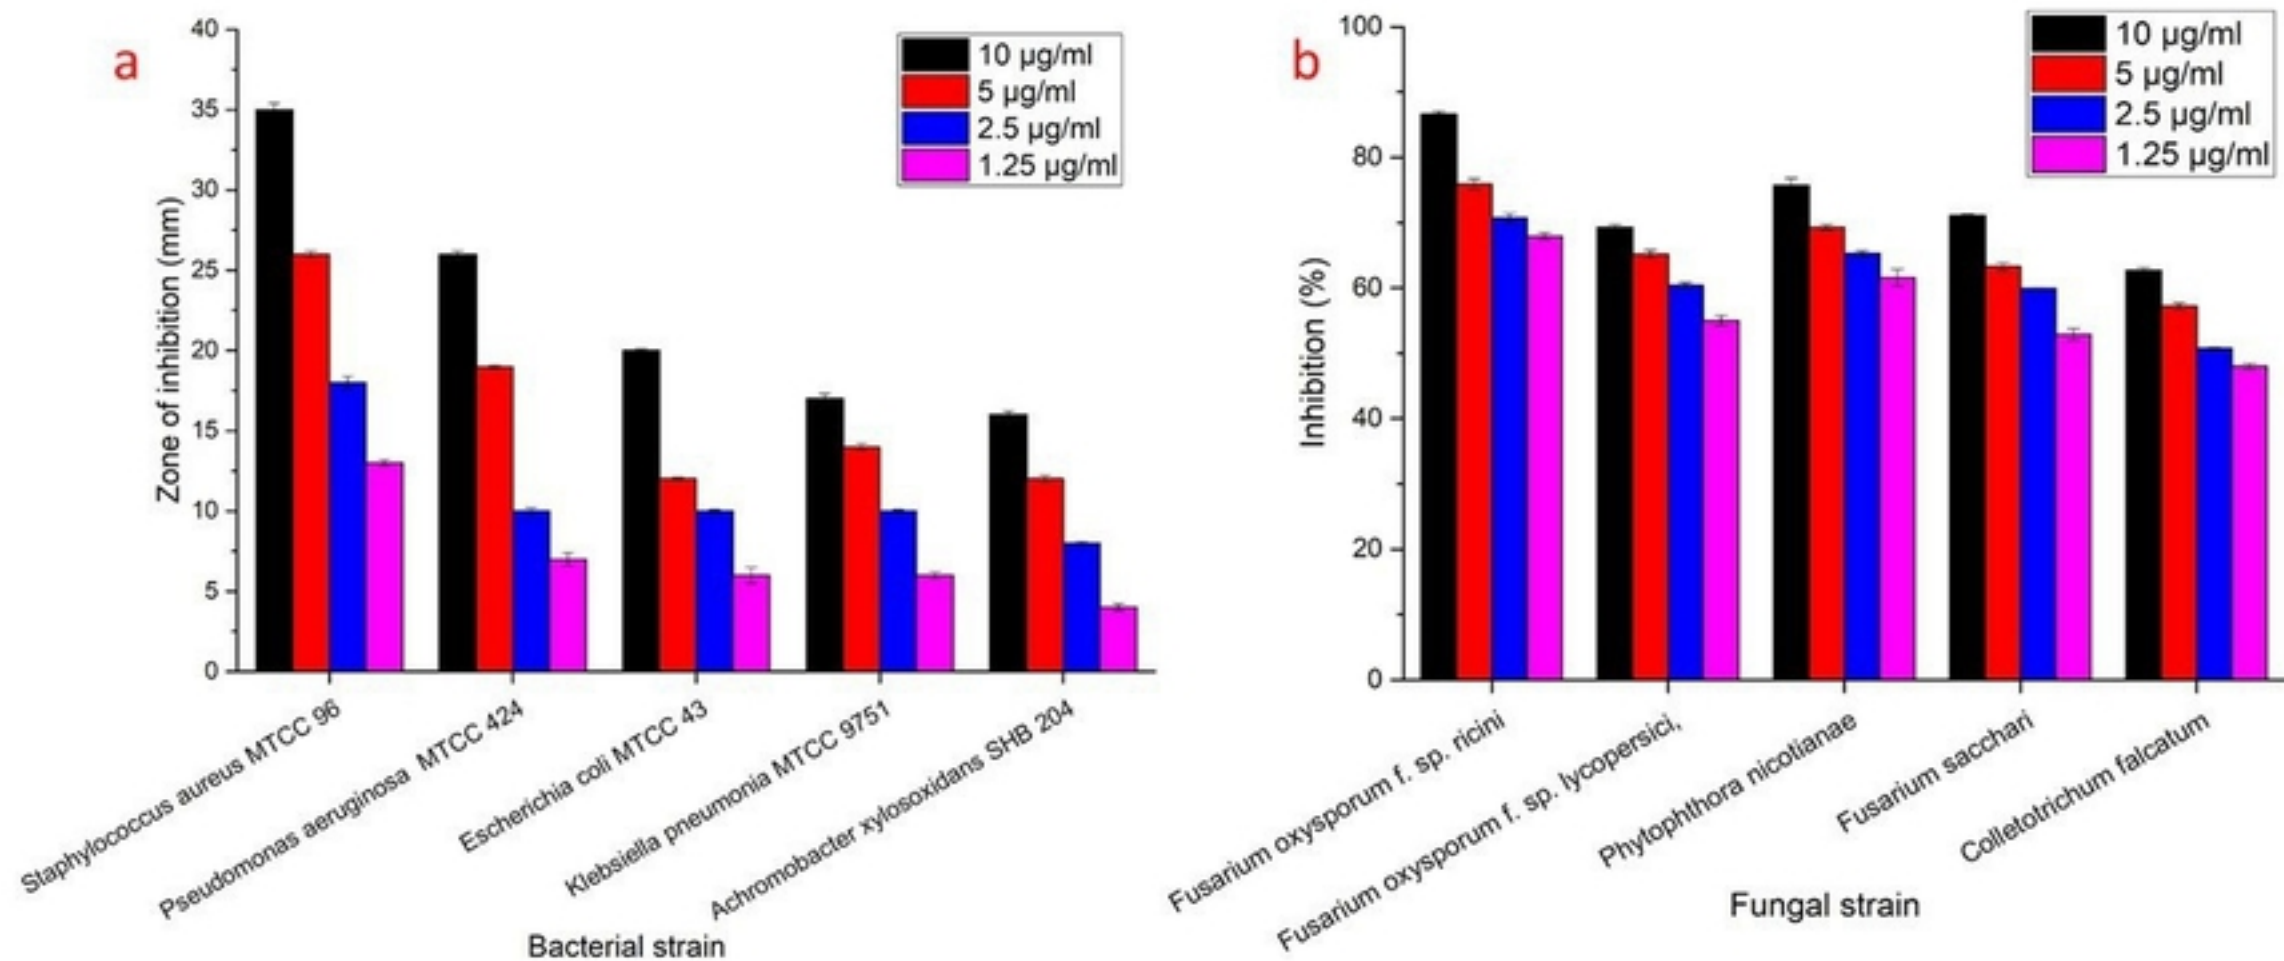

Figure 9
